# Measurement of the muon neutrino charged-current cross sections on water, hydrocarbon and iron, and their ratios, with the T2K on-axis detectors

K. Abe<sup>1</sup>, R. Akutsu<sup>2</sup>, A. Ali<sup>3</sup>, C. Andreopoulos<sup>4,5</sup>, L. Anthony<sup>5</sup>, M. Antonova<sup>6</sup>, S. Aoki<sup>7</sup>, A. Ariga<sup>8</sup>, Y. Ashida<sup>9</sup>, Y. Awataguchi<sup>10</sup>, Y. Azuma<sup>11</sup>, S. Ban<sup>9</sup>, M. Barbi<sup>12</sup>, G. J. Barker<sup>13</sup>, G. Barr<sup>14</sup>, C. Barry<sup>5</sup>, M. Batkiewicz-Kwasniak<sup>15</sup>, F. Bench<sup>5</sup>, V. Berardi<sup>16</sup>, S. Berkman<sup>18,44</sup>, R. M. Berner<sup>8</sup>, L. Berns<sup>19</sup>, S. Bhadra<sup>20</sup>, S. Bienstock<sup>21</sup>, A. Blondel<sup>22,23</sup>, S. Bolognesi<sup>24</sup>, B. Bourguille<sup>25</sup>, S. B. Boyd<sup>13</sup>, D. Brailsford<sup>26</sup>, A. Bravar<sup>22</sup>, C. Bronner<sup>1</sup>, M. Buizza Avanzini<sup>27</sup>, J. Calcutt<sup>28</sup>, T. Campbell<sup>29</sup>, S. Cao<sup>30</sup>, S. L. Cartwright<sup>31</sup>, M. G. Catanesi<sup>16</sup>, A. Cervera<sup>6</sup>, A. Chappell<sup>13</sup>, C. Checchia<sup>3</sup>, D. Cherdack<sup>33</sup>, N. Chikuma<sup>34</sup>, G. Christodoulou<sup>5,23</sup>, J. Coleman<sup>5</sup>, G. Collazuol<sup>3</sup>, D. Coploue<sup>14</sup>, A. Cudd<sup>28</sup>, A. Dabrowska<sup>15</sup>, G. De Rosa<sup>35</sup>, T. Dealtry<sup>26</sup>, P. F. Denner<sup>13</sup>, S. R. Dennis<sup>5</sup>, C. Densham<sup>4</sup>, F. Di Lodovico<sup>36</sup>, N. Dokania<sup>37</sup>, S. Dolan<sup>24,27</sup>, O. Drapier<sup>27</sup>, K. E. Duffy<sup>14</sup>, J. Dumarchez<sup>21</sup>, P. Dunne<sup>38</sup>, S. Emery-Schrenk<sup>24</sup>, A. Ereditato<sup>8</sup>, P. Fernandez<sup>6</sup>, T. Feusels<sup>17,18</sup>, A. J. Finch<sup>26</sup>, G. A. Fiorentini<sup>20</sup>, G. Fiorillo<sup>35</sup>, C. Francois<sup>8</sup>, M. Friend<sup>30,39</sup>, Y. Fujii<sup>30,39</sup>, R. Fujita<sup>34</sup>, D. Fukuda<sup>40</sup>, Y. Fukuda<sup>41</sup>, K. Gameil<sup>17,18</sup>, C. Giganti<sup>21</sup>, F. Gizzarelli<sup>24</sup>, T. Golan<sup>42</sup>, M. Gonin<sup>27</sup>, D. R. Hadley<sup>13</sup>, J. T. Haigh<sup>13</sup>, P. Hamacher-Baumann<sup>43</sup>, M. Hartz<sup>18,44</sup>, T. Hasegawa<sup>30,39</sup>, N. C. Hastings<sup>12</sup>, T. Hayashino<sup>9</sup>, Y. Hayato<sup>1,44</sup>, A. Hiramoto<sup>9</sup>, M. Hogan<sup>45</sup>, J. Holeczek<sup>46</sup>, N. T. Hong Van<sup>47,48</sup>, F. Hosomi<sup>34</sup>, A. K. Ichikawa<sup>9</sup>, M. Ikeda<sup>1</sup>, T. Inoue<sup>11</sup>, R. A. Intonti<sup>16</sup>, T. Ishida<sup>30,39</sup>, T. Ishii<sup>30,39</sup>, M. Ishitsuka<sup>49</sup>, K. Iwamoto<sup>34</sup>, A. Izmaylov<sup>6,50</sup>, B. Jamieson<sup>32</sup>, C. Jesús-Valls<sup>25</sup>, M. Jiang<sup>9</sup>, S. Johnson<sup>29</sup>, P. Jonsson<sup>38</sup>, C. K. Jung<sup>37,51</sup>, M. Kabirnezhad<sup>14</sup>, A. C. Kaboth<sup>4,52</sup>, T. Kajita<sup>2,51</sup>, H. Kakuno<sup>10</sup>, J. Kameda<sup>1</sup>, D. Karlen<sup>18,53</sup>, T. Katori<sup>36</sup>, Y. Kato<sup>1</sup>, E. Kearns<sup>44,51,54</sup>, M. Khabibullin<sup>50</sup>, A. Khotjantsev<sup>50</sup>, H. Kim<sup>11</sup>, J. Kim<sup>17,18</sup>, S. King<sup>36</sup>, J. Kisiel<sup>46</sup>, A. Knight<sup>13</sup>, A. Knox<sup>26</sup>, T. Kobayashi<sup>30,39</sup>, L. Koch<sup>4</sup>, T. Koga<sup>34,\*</sup>, A. Konaka<sup>18</sup>, L. L. Kormos<sup>26</sup>, Y. Koshio<sup>40,51</sup>, K. Kowalik<sup>55</sup>, H. Kubo<sup>9</sup>, Y. Kudenko<sup>50,56</sup>, R. Kurjata<sup>57</sup>, T. Kutter<sup>58</sup>, M. Kuze<sup>19</sup>, L. Labarga<sup>59</sup>, J. Lagoda<sup>55</sup>, M. Lamoureux<sup>24</sup>, P. Lasorak<sup>36</sup>, M. Laveder<sup>3</sup>, M. Lawe<sup>26</sup>, M. Licciardi<sup>27</sup>, T. Lindner<sup>18</sup>, R. P. Litchfield<sup>38</sup>, X. Li<sup>37</sup>, A. Longhin<sup>3</sup>, J. P. Lopez<sup>29</sup>, T. Lou<sup>34</sup>, L. Ludovici<sup>60</sup>, X. Lu<sup>14</sup>, T. Lux<sup>25</sup>, L. Magaletti<sup>16</sup>, K. Mahn<sup>28</sup>, M. Malek<sup>31</sup>, S. Manly<sup>61</sup>, L. Maret<sup>22</sup>, A. D. Marino<sup>29</sup>, J. F. Martin<sup>62</sup>, P. Martins<sup>36</sup>, T. Maruyama<sup>30,39</sup>, T. Matsubara<sup>30</sup>, V. Matveev<sup>50</sup>, K. Mavrokoridis<sup>5</sup>, W. Y. Ma<sup>38</sup>, E. Mazzucato<sup>24</sup>, M. McCarthy<sup>20</sup>, N. McCauley<sup>5</sup>, K. S. McFarland<sup>61</sup>, C. McGrew<sup>37</sup>, A. Mefodiev<sup>50</sup>, C. Metelko<sup>5</sup>, M. Mezzetto<sup>3</sup>, A. Minamino<sup>63</sup>, O. Mineev<sup>50</sup>, S. Mine<sup>64</sup>, M. Miura<sup>1,51</sup>, S. Moriyama<sup>1,51</sup>, J. Morrison<sup>28</sup>, Th. A. Mueller<sup>27</sup>, S. Murphy<sup>65</sup>, Y. Nagai<sup>7</sup>, T. Nakadaira<sup>39,44</sup>, M. Nakahata<sup>44</sup>, Y. Nakajima<sup>1</sup>, A. Nakamura<sup>40</sup>, K. G. Nakamura<sup>9</sup>, K. Nakamura<sup>30,39,44</sup>, K. D. Nakamura<sup>9</sup>, Y. Nakanishi<sup>9</sup>, S. Nakayama<sup>1,51</sup>, T. Nakaya<sup>9,44</sup>, K. Nakayoshi<sup>30,39</sup>, C. Nantais<sup>62</sup>, K. Niewczas<sup>42</sup>, K. Nishikawa<sup>30</sup>, Y. Nishimura<sup>2</sup>, T. S. Nonnenmacher<sup>38</sup>, P. Novella<sup>6</sup>, J. Nowak<sup>26</sup>, H. M. O’Keeffe<sup>26</sup>, L. O’Sullivan<sup>31</sup>, K. Okumura<sup>2,44</sup>, T. Okusawa<sup>11</sup>, S. M. Oser<sup>17,18</sup>, R. A. Owen<sup>36</sup>, Y. Oyama<sup>30,39</sup>, V. Palladino<sup>35</sup>, J. L. Palomino<sup>37</sup>, V. Paolone<sup>66</sup>, W. C. Parker<sup>52</sup>, P. Paudyal<sup>5</sup>, M. Pavin<sup>18</sup>, D. Payne<sup>5</sup>,

L. Pickering<sup>28</sup>, C. Pidcott<sup>31</sup>, E. S. Pinzon Guerra<sup>20</sup>, C. Pistillo<sup>8</sup>, B. Popov<sup>21,67</sup>, K. Porwit<sup>46</sup>, M. Posiadala-Zezula<sup>68</sup>, A. Pritchard<sup>5</sup>, B. Quilain<sup>44</sup>, T. Radermacher<sup>43</sup>, E. Radicioni<sup>16</sup>, P. N. Ratoff<sup>26</sup>, E. Reinherz-Aronis<sup>45</sup>, C. Riccio<sup>35</sup>, E. Rondio<sup>55</sup>, B. Rossi<sup>35</sup>, S. Roth<sup>43</sup>, A. Rubbia<sup>65</sup>, A. C. Ruggeri<sup>35</sup>, A. Rychter<sup>57</sup>, K. Sakashita<sup>30,39</sup>, F. Sánchez<sup>22</sup>, S. Sasaki<sup>10</sup>, K. Scholberg<sup>51,69</sup>, J. Schwehr<sup>45</sup>, M. Scott<sup>38</sup>, Y. Seiya<sup>11</sup>, T. Sekiguchi<sup>30,39</sup>, H. Sekiya<sup>1,44,51</sup>, D. Sgalaberna<sup>22</sup>, R. Shah<sup>4,14</sup>, A. Shaikhiev<sup>50</sup>, F. Shaker<sup>32</sup>, D. Shaw<sup>26</sup>, A. Shaykina<sup>50</sup>, M. Shiozawa<sup>1,44</sup>, A. Smirnov<sup>50</sup>, M. Smy<sup>64</sup>, J. T. Sobczyk<sup>42</sup>, H. Sobel<sup>44,64</sup>, Y. Sonoda<sup>1</sup>, J. Steinmann<sup>43</sup>, T. Stewart<sup>4</sup>, P. Stowell<sup>31</sup>, S. Suvorov<sup>24,50</sup>, A. Suzuki<sup>7</sup>, S. Y. Suzuki<sup>30,39</sup>, Y. Suzuki<sup>44</sup>, A. A. Sztuc<sup>38</sup>, R. Tacik<sup>12,18</sup>, M. Tada<sup>30,39</sup>, A. Takeda<sup>1</sup>, Y. Takeuchi<sup>7,44</sup>, R. Tamura<sup>34</sup>, H. K. Tanaka<sup>1,51</sup>, H. A. Tanaka<sup>62,70</sup>, L. F. Thompson<sup>31</sup>, W. Toki<sup>45</sup>, C. Touramanis<sup>5</sup>, K. M. Tsui<sup>5</sup>, T. Tsukamoto<sup>30,39</sup>, M. Tzanov<sup>58</sup>, Y. Uchida<sup>38</sup>, W. Uno<sup>9</sup>, M. Vagins<sup>44,64</sup>, Z. Vallari<sup>37</sup>, D. Vargas<sup>25</sup>, G. Vasseur<sup>24</sup>, C. Vilela<sup>37</sup>, T. Vladisavljevic<sup>14,44</sup>, V. V. Volkov<sup>50</sup>, T. Wachala<sup>15</sup>, J. Walker<sup>32</sup>, Y. Wang<sup>37</sup>, D. Wark<sup>4,14</sup>, M. O. Wascko<sup>38</sup>, A. Weber<sup>4,14</sup>, R. Wendell<sup>9,51</sup>, M. J. Wilking<sup>37</sup>, C. Wilkinson<sup>8</sup>, J. R. Wilson<sup>36</sup>, R. J. Wilson<sup>45</sup>, C. Wret<sup>61</sup>, Y. Yamada<sup>†,30</sup>, K. Yamamoto<sup>11</sup>, S. Yamasu<sup>40</sup>, C. Yanagisawa<sup>37,71</sup>, G. Yang<sup>37</sup>, T. Yano<sup>1</sup>, K. Yasutome<sup>9</sup>, S. Yen<sup>18</sup>, N. Yershov<sup>50</sup>, M. Yokoyama<sup>34,51</sup>, T. Yoshida<sup>19</sup>, M. Yu<sup>20</sup>, A. Zalewska<sup>15</sup>, J. Zalipska<sup>55</sup>, K. Zaremba<sup>57</sup>, G. Zarnecki<sup>55</sup>, M. Ziembicki<sup>57</sup>, E. D. Zimmerman<sup>29</sup>, M. Zito<sup>24</sup>, S. Zsoldos<sup>36</sup>, and A. Zykova<sup>50</sup>

<sup>1</sup>University of Tokyo, Institute for Cosmic Ray Research, Kamioka Observatory, Kamioka, Japan

<sup>2</sup>University of Tokyo, Institute for Cosmic Ray Research, Research Center for Cosmic Neutrinos, Kashiwa, Japan

<sup>3</sup>INFN Sezione di Padova and Università di Padova, Dipartimento di Fisica, Padova, Italy

<sup>4</sup>STFC, Rutherford Appleton Laboratory, Harwell, Oxford, and Daresbury Laboratory, Warrington, UK

<sup>5</sup>University of Liverpool, Department of Physics, Liverpool, UK

<sup>6</sup>IFIC (CSIC & University of Valencia), Valencia, Spain

<sup>7</sup>Kobe University, Kobe, Japan

<sup>8</sup>University of Bern, Albert Einstein Center for Fundamental Physics, Laboratory for High Energy Physics (LHEP), Bern, Switzerland

<sup>9</sup>Kyoto University, Department of Physics, Kyoto, Japan

<sup>10</sup>Tokyo Metropolitan University, Department of Physics, Tokyo, Japan

<sup>11</sup>Osaka City University, Department of Physics, Osaka, Japan

<sup>12</sup>University of Regina, Department of Physics, Regina, SK, Canada

<sup>13</sup>University of Warwick, Department of Physics, Coventry, UK

<sup>14</sup>Oxford University, Department of Physics, Oxford, UK

<sup>15</sup>H. Niewodniczanski Institute of Nuclear Physics PAN, Cracow, Poland

<sup>16</sup>INFN Sezione di Bari and Università e Politecnico di Bari, Dipartimento Interuniversitario di Fisica, Bari, Italy

<sup>17</sup>University of British Columbia, Department of Physics and Astronomy, Vancouver, BC, Canada

<sup>18</sup>TRIUMF, Vancouver, BC, Canada

<sup>19</sup>Tokyo Institute of Technology, Department of Physics, Tokyo, Japan

<sup>20</sup>York University, Department of Physics and Astronomy, Toronto, ON, Canada

<sup>21</sup>Sorbonne Université, Université Paris Diderot, CNRS/IN2P3, Laboratoire de Physique Nucléaire et de Hautes Energies (LPNHE), Paris, France

<sup>22</sup>University of Geneva, Section de Physique, DPNC, Geneva, Switzerland

<sup>23</sup>Present address: CERN

<sup>24</sup>IRFU, CEA Saclay, Gif-sur-Yvette, France

<sup>25</sup>Institut de Física d'Altes Energies (IFAE), The Barcelona Institute of Science and Technology, Campus UAB, Bellaterra (Barcelona) Spain

<sup>26</sup>Lancaster University, Physics Department, Lancaster, UK

<sup>27</sup>Ecole Polytechnique, IN2P3-CNRS, Laboratoire Leprince-Ringuet, Palaiseau, France

<sup>28</sup>Michigan State University, Department of Physics and Astronomy, East Lansing, MI, USA

<sup>29</sup>University of Colorado at Boulder, Department of Physics, Boulder, CO, USA

- <sup>30</sup>High Energy Accelerator Research Organization (KEK), Tsukuba, Ibaraki, Japan  
<sup>31</sup>University of Sheffield, Department of Physics and Astronomy, Sheffield, UK  
<sup>32</sup>University of Winnipeg, Department of Physics, Winnipeg, MB, Canada  
<sup>33</sup>University of Houston, Department of Physics, Houston, TX, US  
<sup>34</sup>University of Tokyo, Department of Physics, Tokyo, Japan  
<sup>35</sup>INFN Sezione di Napoli and Università di Napoli, Dipartimento di Fisica, Napoli, Italy  
<sup>36</sup>Queen Mary University of London, School of Physics and Astronomy, London, UK  
<sup>37</sup>State University of New York at Stony Brook, Department of Physics and Astronomy, Stony Brook, NY, USA  
<sup>38</sup>Imperial College London, Department of Physics, London, UK  
<sup>39</sup>J-PARC, Tokai, Japan  
<sup>40</sup>Okayama University, Department of Physics, Okayama, Japan  
<sup>41</sup>Miyagi University of Education, Department of Physics, Sendai, Japan  
<sup>42</sup>Wroclaw University, Faculty of Physics and Astronomy, Wroclaw, Poland  
<sup>43</sup>RWTH Aachen University, III. Physikalisches Institut, Aachen, Germany  
<sup>44</sup>Kavli Institute for the Physics and Mathematics of the Universe (WPI), The University of Tokyo Institutes for Advanced Study, University of Tokyo, Kashiwa, Chiba, Japan  
<sup>45</sup>Colorado State University, Department of Physics, Fort Collins, CO, USA  
<sup>46</sup>University of Silesia, Institute of Physics, Katowice, Poland  
<sup>47</sup>Institute For Interdisciplinary Research in Science and Education (IFIRSE), ICISE, Quy Nhon, Vietnam  
<sup>48</sup>Institute of Physics (IOP), Vietnam Academy of Science and Technology (VAST), Hanoi, Vietnam  
<sup>49</sup>Tokyo University of Science, Faculty of Science and Technology, Department of Physics, Noda, Chiba, Japan  
<sup>50</sup>Institute for Nuclear Research of the Russian Academy of Sciences, Moscow, Russia  
<sup>51</sup>Affiliated member at Kavli Institute for the Physics and Mathematics of the Universe (WPI), The University of Tokyo Institutes for Advanced Study, University of Tokyo, Kashiwa, Chiba, Japan  
<sup>52</sup>Royal Holloway University of London, Department of Physics, Egham, Surrey, UK  
<sup>53</sup>University of Victoria, Department of Physics and Astronomy, Victoria, BC, Canada  
<sup>54</sup>Boston University, Department of Physics, Boston, MA, USA  
<sup>55</sup>National Centre for Nuclear Research, Warsaw, Poland  
<sup>56</sup>National Research Nuclear University “MEPhI” and Moscow Institute of Physics and Technology, Moscow, Russia  
<sup>57</sup>Warsaw University of Technology, Institute of Radioelectronics, Warsaw, Poland  
<sup>58</sup>Louisiana State University, Department of Physics and Astronomy, Baton Rouge, LA, USA  
<sup>59</sup>University Autonoma Madrid, Department of Theoretical Physics, 28049 Madrid, Spain  
<sup>60</sup>INFN Sezione di Roma and Università di Roma “La Sapienza”, Roma, Italy  
<sup>61</sup>University of Rochester, Department of Physics and Astronomy, Rochester, NY, USA  
<sup>62</sup>University of Toronto, Department of Physics, Toronto, ON, Canada  
<sup>63</sup>Yokohama National University, Faculty of Engineering, Yokohama, Japan  
<sup>64</sup>University of California, Irvine, Department of Physics and Astronomy, Irvine, CA, USA  
<sup>65</sup>ETH Zurich, Institute for Particle Physics, Zurich, Switzerland  
<sup>66</sup>University of Pittsburgh, Department of Physics and Astronomy, Pittsburgh, PA, USA  
<sup>67</sup>JINR, Dubna, Russia  
<sup>68</sup>University of Warsaw, Faculty of Physics, Warsaw, Poland  
<sup>69</sup>Duke University, Department of Physics, Durham, NC, USA  
<sup>70</sup>SLAC National Accelerator Laboratory, Stanford University, Menlo Park, CA, USA  
<sup>71</sup>BMCC/CUNY, Science Department, New York, NY, USA

\*E-mail: taichiro@post.kek.jp

†Deceased.

Received April 11, 2019; Accepted May 8, 2018; Published September 26, 2019

.....  
 We report a measurement of the flux-integrated  $\nu_\mu$  charged-current cross sections on water, hydrocarbon, and iron in the T2K on-axis neutrino beam with a mean neutrino energy of 1.5 GeV. The measured cross sections on water, hydrocarbon, and iron are  $\sigma_{\text{CC}}^{\text{H}_2\text{O}} = (0.840 \pm 0.010(\text{stat.})_{-0.08}^{+0.10}(\text{syst.})) \times 10^{-38} \text{ cm}^2/\text{nucleon}$ ,  $\sigma_{\text{CC}}^{\text{CH}} = (0.817 \pm 0.007(\text{stat.})_{-0.08}^{+0.11}(\text{syst.})) \times 10^{-38} \text{ cm}^2/\text{nucleon}$ , and  $\sigma_{\text{CC}}^{\text{Fe}} = (0.859 \pm 0.003(\text{stat.})_{-0.10}^{+0.12}(\text{syst.})) \times 10^{-38} \text{ cm}^2/\text{nucleon}$ , respectively, for a restricted phase space of induced muons:  $\theta_\mu < 45^\circ$  and  $p_\mu > 0.4 \text{ GeV}/c$  in the

laboratory frame. The measured cross section ratios are  $\sigma_{\text{CC}}^{\text{H}_2\text{O}}/\sigma_{\text{CC}}^{\text{CH}} = 1.028 \pm 0.016(\text{stat.}) \pm 0.053(\text{syst.})$ ,  $\sigma_{\text{CC}}^{\text{Fe}}/\sigma_{\text{CC}}^{\text{H}_2\text{O}} = 1.023 \pm 0.012(\text{stat.}) \pm 0.058(\text{syst.})$ , and  $\sigma_{\text{CC}}^{\text{Fe}}/\sigma_{\text{CC}}^{\text{CH}} = 1.049 \pm 0.010(\text{stat.}) \pm 0.043(\text{syst.})$ . These results, with an unprecedented precision for the measurements of neutrino cross sections on water in the studied energy region, show good agreement with the current neutrino interaction models used in the T2K oscillation analyses.

Subject Index C04, C32

## 1. Introduction

The Tokai-to-Kamioka (T2K) experiment [1] is a long-baseline neutrino oscillation experiment that started taking physics data in 2010. The T2K experiment studies the properties of neutrino oscillations via the disappearance of muon (anti-)neutrinos and the appearance of electron (anti-)neutrinos from a nearly pure muon (anti-)neutrino beam, which is produced by the J-PARC accelerator complex. The neutrino beam characteristics and neutrino–nucleus interactions are measured with a suite of near detectors, which are situated 280 m from the production target, consisting of the so-called INGRID [2] and ND280 [3–7]. The INGRID is placed at the center of the neutrino beam (on-axis), while the ND280 is at an off-axis angle of  $2.5^\circ$ . The neutrino oscillation patterns are observed with the  $2.5^\circ$  off-axis far detector, Super-Kamiokande [8], which is located 295 km away from the production target. In order to precisely measure neutrino oscillations, understanding of the neutrino interactions with nuclei is essential. In the current T2K oscillation analysis [9], data samples of charged-current candidates in which the interaction vertex is found in one of two fine-grained detectors, FGD1 or FGD2 [4], are used to constrain the neutrino flux prediction and cross section models. The former detector consists of 100% plastic scintillators (hydrocarbon) and the latter consists of a mixture of plastic scintillators and water, while the far detector consists of 100% water.

The neutrino interaction model is used to extrapolate the near detector spectra to the (oscillated) far detector spectra in a few significant ways. First, the T2K off-axis near detector angular acceptance is more limited than the far detector. Second, the near detector event rate also includes significant interactions on materials other than the far detector (water) target. Finally, the interaction model is tuned at the near detector to predict the far detector energy spectra and this parameterization can be incomplete. Therefore, testing the interaction model with different target materials and at various ranges of neutrino energies is valuable to the T2K oscillation analysis. However, there have only been a few publications of the neutrino cross sections on water so far [10–12]. Two exclusive channels of charged-current interactions are measured by the ND280 [10,11] with approximately 15% uncertainties with a mean neutrino energy of 0.6 GeV. There is only one measurement of axial vector mass [12] with 10% uncertainty with a mean neutrino energy above 1 GeV.

A new water-target neutrino detector, named the Water Module [13], has been constructed for the precise measurements of neutrino interactions on water with a mean neutrino energy of 1.5 GeV. In this article, by using the Water Module and the other T2K detectors including the Proton Module [14] and INGRID [2], we measure the  $\nu_\mu$  charged-current (CC) cross sections on water, hydrocarbon, iron, and their ratios. Dominant errors of the absolute cross section measurements come from the uncertainty of the T2K neutrino beam prediction, which largely cancels out when performing measurements on their cross section ratios. This method was established in the previous measurement of a cross section ratio between hydrocarbon and iron by using the Proton Module and INGRID [14]. In this article, measurements of neutrino interaction on water with the Water Module are conducted for the first time. In addition, in order to reduce the dependence on the Monte Carlo implemented model of neutrino–nucleus interactions in extracting the cross section values, a method for unfolding

**Table 1.** Summary of detector specifications of the Water Module, Proton Module, and one of the INGRID modules. The target masses are calculated inside the fiducial volumes, which correspond to the effective target masses and are specially tuned for this analysis, as described in Sect. 5.

| Parameter                                                                     | Water Module                     | Proton Module                                               | INGRID module   |
|-------------------------------------------------------------------------------|----------------------------------|-------------------------------------------------------------|-----------------|
| Target mass in fiducial volume (ton)                                          | 0.10                             | 0.16                                                        | 2.1             |
| Main target materials and fraction                                            | H <sub>2</sub> O (80%), CH (19%) | CH (98%)                                                    | Fe (96%)        |
| Dimension of a scintillator (cm <sup>3</sup> )                                | 100 × 2.5 × 0.3                  | 120 × 2.5 × 1.3 (SciBar-type),<br>120 × 5 × 1 (INGRID-type) | 120 × 5 × 1     |
| Dimension of an iron plane (cm <sup>3</sup> )                                 | —                                | —                                                           | 124 × 124 × 6.5 |
| The number of readout channels                                                | 1280                             | 1204                                                        | 616             |
| MPPC serial number                                                            | S13660                           | S10362-13-050C                                              | S10362-13-050C  |
| MPPC gain stability                                                           | 10%                              | 10%                                                         | 10%             |
| MPPC dark noise rate<br>(hits/module/bunch)                                   | 0.2                              | 12                                                          | 6               |
| Mean scintillator<br>light yield for MIP<br>(p.e. per scintillator thickness) | 16                               | 56 (SciBar-type),<br>23 (INGRID-type)                       | 23              |
| Angular acceptance with<br>respect to beam axis                               | 0° to 90°                        | 0° to 75°                                                   | 0° to 60°       |
| Period located at on-axis position                                            | July 2016–                       | November 2010–May 2016                                      | 2009–           |

the total cross section as a function of muon scattering angles is implemented. Hereafter, we will describe the detector configuration, the Monte Carlo simulation, the used data sample, the event selection, the method to extract the cross sections, systematic uncertainties, and the results.

## 2. Detector configuration

We use the three detectors, INGRID, Proton Module, and Water Module, as iron (Fe), hydrocarbon (CH), and water (H<sub>2</sub>O) interaction targets, respectively. Table 1 shows the specifications of the three detectors. INGRID consists of 14 identical modules arranged in a cross shape; each module has a sandwich structure comprising 9 iron planes and 11 tracking planes as shown in Fig. 1. INGRID has been operating since 2009 to monitor the neutrino beam rate, its direction, and stability in real time. The tracking planes are formed from two layers of scintillator, each of which is composed of 24 bars that are oriented either horizontally or vertically. The thickness of the iron planes is 6.5 cm and the thickness of the scintillator is 1.0 cm. The iron planes, which play the role of the neutrino interaction target in this analysis, make up 96% of the total fiducial mass of the module. There are veto planes surrounding the module designed for tracking the charged particles entering the detector. More detailed information about the INGRID can be found in Ref. [2]. In this analysis, the central horizontal INGRID module is used as the iron target. The three horizontal INGRID modules surrounding the beam center are used for muon identification for the Proton Module and Water Module.

The Proton Module is a plastic scintillator target detector located between the horizontal and vertical INGRID modules, as shown in Fig. 2. It was built for the measurement of the neutrino cross section on hydrocarbon and it was located at the on-axis position from November 2010 to May 2016. It consists of 34 tracking planes with each plane being an array of 32 scintillator bars that are oriented either horizontally or vertically. Two types (SciBar-type and INGRID-type) of scintillator bars, which have different sizes, are used in the inner and outer sections of each tracking plane. Hydrocarbon in the scintillators of the tracking planes serves as the neutrino interaction target and comprises 98% of the total fiducial mass of the Proton Module. Similar to the INGRID modules,



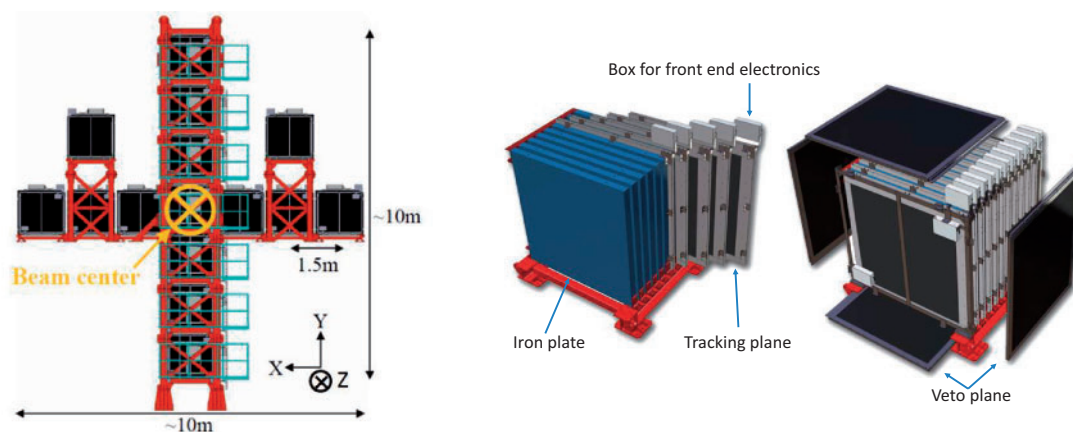

**Fig. 1.** Schematic view of the INGRID detector (left) and one of the modules (right). The coordinate system used in this article is shown in the left figure.

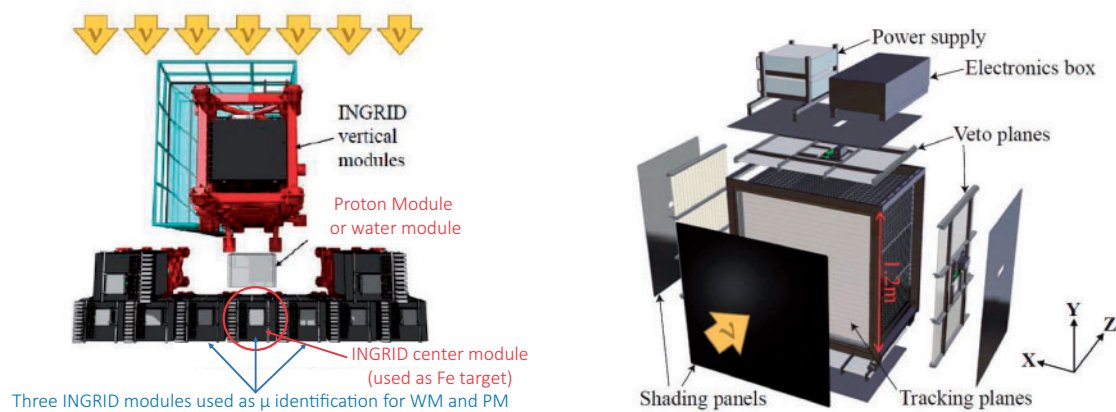

**Fig. 2.** Top views of the Water Module, Proton Module, and INGRID (left) and schematic view of the Proton Module (right) [14].

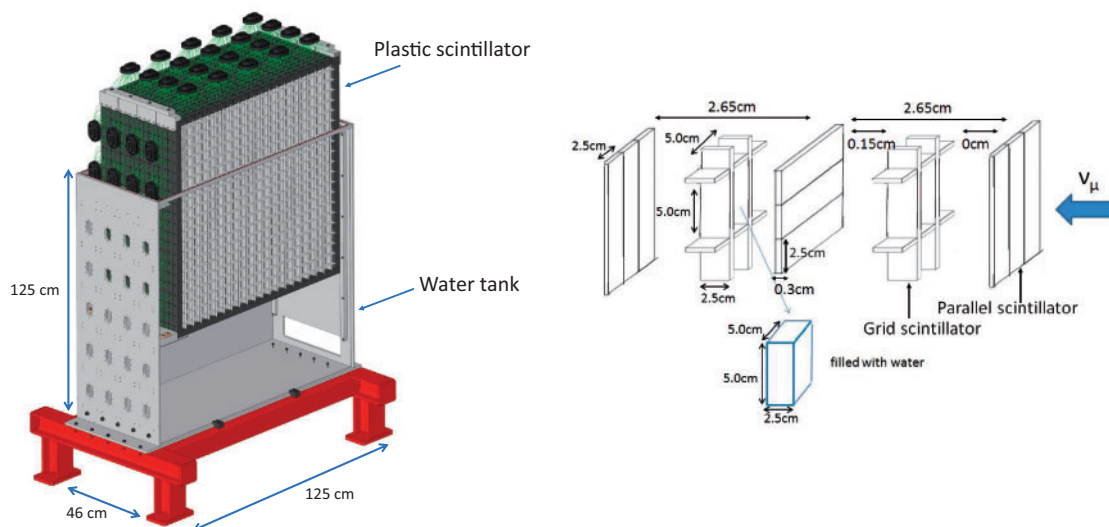

**Fig. 3.** Schematic view of the Water Module (left) and the layout of scintillators (right).

the Proton Module is composed of veto planes surrounding the tracking planes of the detector. More detailed information about the Proton Module can be found in Ref. [14].

The Water Module is a neutrino detector with an interaction target region composed of 80% water and 20% plastic scintillators. The high fraction of water in the detector, in fact higher than previous water-target neutrino detectors [3,4], is essential to reduce the backgrounds induced by the neutrino interactions on non-water materials. The Water Module has been located at the on-axis position between the INGRID horizontal modules and vertical modules since June 2016, replacing the Proton Module. The Water Module consists of a stainless steel tank filled with water and 16 scintillator tracking planes immersed in the water, as shown in Fig. 3. The eight tracking planes are placed alternately in the  $x$ -direction and  $y$ -direction along the  $z$ -direction so that 3D tracks may be reconstructed. Each tracking plane is an array of 80 scintillator bars. Half of these bars, called parallel scintillators, are placed along the  $xy$ -direction. The other 40 bars, called grid scintillators, are placed along the  $z$ -direction with a grid-like structure in order to achieve a large angular acceptance. The plastic scintillators of dimension 100 cm (length)  $\times$  2.5 cm (width)  $\times$  0.3 cm (thickness) were produced in the Fermi National Accelerator Laboratory [15]. The scintillators are made of polystyrene, infused with PPO (1%) and POPOP (0.03%). The manufactured scintillator, co-extruded with a white reflective coating of  $\text{TiO}_2$  infused in polystyrene, has a rectangular cross section with a groove to house a wavelength shifting (WLS) fiber (Kuraray Y-11 [16]). The WLS fiber is glued onto the scintillator with optical cement (Eljen Technology EJ-500 [17]). The surface of the scintillator is painted with a black cement of acrylic silicon to prevent optical crosstalk between the scintillators. Each layer of scintillator bars is affixed to a mechanical frame that sits inside a water tank. Spaces between scintillators are filled with water. Scintillation light from the scintillator is collected by the WLS fiber and detected by a multi-pixel photon counter (MPPC) [18], similar to that for the INGRID and Proton Module. While the Hamamatsu S10362-13-050C MPPC was used in the INGRID and Proton Module, a newer type of MPPC, S13660 with higher gain, lower noise rate, crosstalk rate, and after-pulse rate, is used in the Water Module. The same Trip-t electronics [19] are used for all three detectors. To record data from the neutrino beam, delivered typically in eight bunches with a cycle of 581 ns for each 2.48 s, a trigger from the J-PARC accelerator is provided to each detector. The integrated charge and hit timing of all channels are digitized and recorded with a 2.5 photoelectron (p.e.) threshold for each beam bunch.

### 3. Monte Carlo simulation

A Monte Carlo (MC) simulation is used for the estimation of background contamination and signal detection efficiency. Three pieces of software are used for the chain of simulation: JNUBEAM [20] for the neutrino flux prediction, NEUT [21] for the neutrino interactions with nuclei, and a GEANT4 [22]-based detector simulation. JNUBEAM simulates the interaction of 30 GeV primary protons on a graphite target, the propagation of the secondary and tertiary produced mesons in the magnetic fields induced by the magnetic horns, and their decays in the decay volume. The simulation uses the proton beam profiles measured by the J-PARC neutrino beam line and is tuned with external hadron production measurements, mainly from the NA61/SHINE experiment [23,24]. We can select either a muon neutrino beam or a muon anti-neutrino beam by changing the current polarity of the focusing magnetic horns. In this analysis, data collected in the former beam configuration are used. The simulated on-axis neutrino beam has a mean energy of 1.5 GeV and a  $1\sigma$  standard deviation between  $-0.75$  GeV and  $+0.85$  GeV, as shown in Fig. 4.

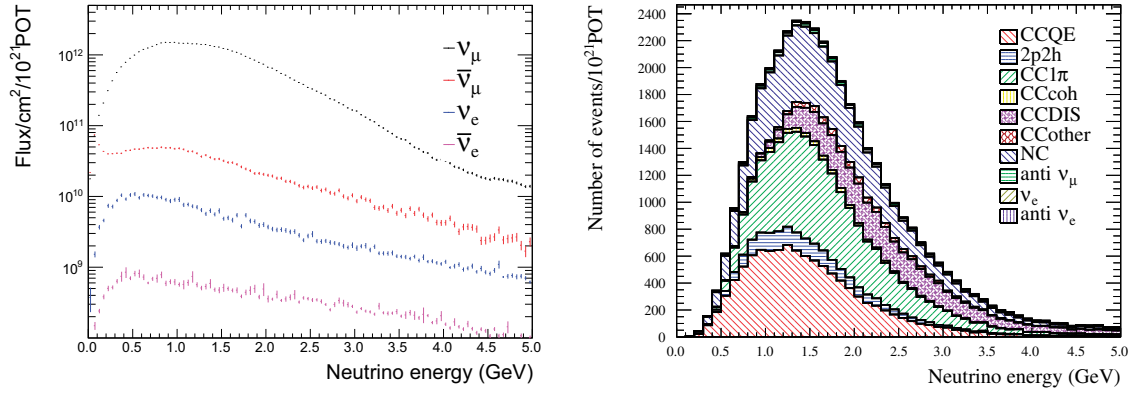

**Fig. 4.** Neutrino flux per  $10^{21}$  protons on target (POT) predicted by JNUBEAM in the muon neutrino beam mode at the position of the simulated Water Module (left) and the energy of neutrinos that interact with the  $\text{H}_2\text{O}$  target inside the fiducial volume of the Water Module predicted by NEUT version 5.3.3 (right). In the right figure, the category of CCDIS includes both CC multi-pion and DIS production.

**Table 2.** Nominal models of the neutrino–nucleus interactions implemented in NEUT used in this analysis.

| Mode      | Nominal model                                                                                       | Parameter                                                                                                                                                |
|-----------|-----------------------------------------------------------------------------------------------------|----------------------------------------------------------------------------------------------------------------------------------------------------------|
| CCQE-like | Dipole type axial form factor                                                                       | $M_A^{\text{QE}} = 1.15 \text{ GeV}/c^2$                                                                                                                 |
|           | RFG model by Smith–Moniz [25]<br>with binding energy ( $E_b$ ) and Fermi surface momentum ( $p_F$ ) | $E_b = 25, 27, 33 \text{ MeV}$ and<br>$p_F = 217, 225, 250 \text{ MeV}/c$ for<br>$^{12}\text{C}$ , $^{16}\text{O}$ , and $^{56}\text{Fe}$ , respectively |
|           | RPA model by Nieves et al. [26]                                                                     | RPA is applied for $^{12}\text{O}$ and $^{16}\text{C}$<br>RPA is not applied for $^{56}\text{Fe}$                                                        |
|           | 2p2h model by Nieves et al. [27]                                                                    | Normalization                                                                                                                                            |
| $1\pi$    | Model by Rein–Sehgal [30]                                                                           | $C_5^A(0) = 1.01$<br>$M_A^{\text{Res}} = 0.95 \text{ GeV}/c^2$<br>Isospin $\frac{1}{2} \text{ BG} = 1.30$                                                |
| DIS       | PYTHIA [31], parton distribution function by<br>GRV98 with Bodek and Yang correction [32–34]        | Energy-dependent normalization                                                                                                                           |
| Coherent  | Model by Berger–Sehgal [35]                                                                         | Normalization                                                                                                                                            |

For a given flux of incoming neutrinos, NEUT simulates the neutrino interactions with nuclei, including initial and final state interactions inside the nuclei, in order to provide the four-momenta of all induced particles. In this analysis, version 5.3.3 of NEUT is used. CC quasi-elastic (CCQE)-like, neutral-current (NC) elastic, CC and NC single pion production ( $1\pi$ ), deep inelastic scattering (DIS), multi-pion production, and coherent interactions are simulated. The CCQE-like interactions, characterized by the inclusion of a single charged lepton and no mesons in the final state, are simulated with a relativistic Fermi gas model (RFG) [25], random phase approximation (RPA) [26], and multi-nucleon (2p2h) interactions [27]. In addition to the nominal NEUT model, we test the sensitivity of the analysis to determining alternate available models [28]. Table 2 shows the nominal settings for each of the interaction models and tunable parameters in NEUT in this analysis. More details about the underlying neutrino interaction models implemented in NEUT that are used in the analysis can be found in Ref. [29]. Figure 4 shows the energy of neutrinos that interacted with the target nuclei of the Water Module simulated by NEUT. The main modes of the CC interactions



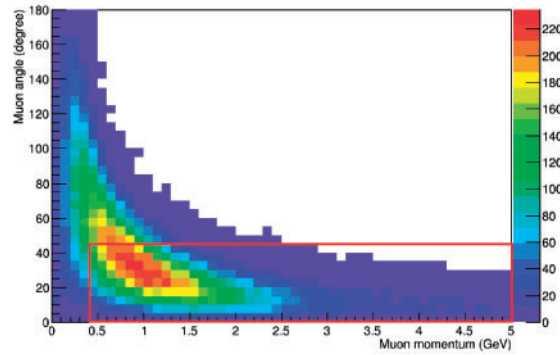

**Fig. 5.** Scattering angle and momentum of muons produced by CC interactions on the  $\text{H}_2\text{O}$  target predicted by NEUT. The highlighted red rectangle includes the signal region where  $p_\mu < 45^\circ$  and  $p_\mu > 0.4 \text{ GeV}/c$ .

are CCQE<sup>1</sup>, CC1 $\pi$ , CC multi-pion, and DIS production. The fraction of NC interaction is 30% of all interactions. Figure 5 shows the momentum and scattering angle distributions in the laboratory frame for muons produced by  $\nu_\mu$  CC interactions. In this analysis, due to the limited acceptance of the horizontal INGRID modules to be used for muon identification for the Water Module and Proton Module as described in Sect. 5.5, we define the signal with a restricted phase space of muon kinematics, particularly CC interactions with  $\theta_\mu < 45^\circ$  and  $p_\mu > 0.4 \text{ GeV}/c$  in the laboratory frame. The cross section of the signal per nucleon is predicted by NEUT to be slightly different amongst  $\text{H}_2\text{O}$ , CH, and Fe, as shown in Table 3. This is due to the target dependence of the total cross section of the CC coherent interaction, which is proportional to the square of the atomic number, and the difference in the fraction of neutrons and protons per nucleus for the targets considered.

GEANT4 simulates the behavior of the secondary particles induced by the neutrino–nucleus interactions in the detector. Version v9r2p01n00 of GEANT4 and the physics list of QGSP BERT are used for the simulation. The geometry of the three detectors and the walls of the detector hall are modeled in GEANT4 based on the measurements performed during the detector construction. The responses of the scintillator, MPPC, and electronics are modeled based on the measurements, as shown in Table 1. The energy deposited in the scintillators estimated by GEANT4 is converted to the observed number of p.e. by multiplying it by a constant determined from measurements with minimum ionization particles (MIP), performed during the detector operation. The following effects are taken into account: the quenching effect of the scintillator; position-dependent light collection efficiency of WLS fibers; attenuation and propagation time of the light in the WLS fiber; crosstalk between grid scintillators; MPPC noise; MPPC crosstalk and after-pulses; MPPC saturation; noise from electronics; gate width of the electronics; and statistical fluctuation of photon counting. For the physics analysis, the neutrino flux and interactions on detector targets, plastic scintillators, and main mechanical structures of the detector and the walls of the detector hall are simulated for the three detectors. Backgrounds from cosmic rays are negligible, as described in Sect. 7.3, and are not simulated for the physics analysis.

#### 4. Data samples

In this article, the data samples recorded by both the INGRID and Proton Module were taken from November 2010 to May 2013. The total number of protons on target (POT) is  $5.89 \times 10^{20}$  with

<sup>1</sup> Here, 2p2h interactions are not included.

**Table 3.** Flux-integrated CC cross sections per nucleon for  $\nu_\mu$  on Fe, CH, and H<sub>2</sub>O simulated by NEUT. Neutrino interaction parameters used for the simulation are listed in Table 2. Because RPA for Fe is not implemented in NEUT at present, the expectation of  $\sigma_{\text{Fe}}$  with RPA is not listed.

| Cross section                                    | NEUT expectation with RPA            | NEUT expectation without RPA         |
|--------------------------------------------------|--------------------------------------|--------------------------------------|
| $\sigma_{\text{H}_2\text{O}}$                    | $0.819 \times 10^{-38} \text{ cm}^2$ | $0.860 \times 10^{-38} \text{ cm}^2$ |
| $\sigma_{\text{CH}}$                             | $0.832 \times 10^{-38} \text{ cm}^2$ | $0.875 \times 10^{-38} \text{ cm}^2$ |
| $\sigma_{\text{Fe}}$                             | not available                        | $0.904 \times 10^{-38} \text{ cm}^2$ |
| $\sigma_{\text{H}_2\text{O}}/\sigma_{\text{CH}}$ | 0.984                                | 0.983                                |
| $\sigma_{\text{Fe}}/\sigma_{\text{H}_2\text{O}}$ | not available                        | 1.051                                |
| $\sigma_{\text{Fe}}/\sigma_{\text{CH}}$          | not available                        | 1.033                                |

the neutrino-mode beam. In July 2016, after the Water Module construction and its commissioning were completed, the Water Module replaced the Proton Module for physics data taking. A total of  $7.25 \times 10^{20}$  POT were collected with the neutrino-mode beam by the Water Module and INGRID during the period between October 2016 and April 2017.

## 5. Event selections

In this analysis, we define the signal with a restricted phase space of muon kinematics, particularly CC interactions with  $\theta_\mu < 45^\circ$  and  $p_\mu > 0.4 \text{ GeV}/c$ . The main signature of CC interactions is the presence of a muon-like track produced inside the detector. Neutrino interactions originating from outside the detectors, CC interactions with non-target materials inside the detectors (mainly scintillators for the studied case with the Water Module),  $\bar{\nu}_\mu, \nu_e, \bar{\nu}_e$  CC interactions, and NC interactions are the main sources of background in this analysis. The background from the NC interactions does not produce muons. In order to identify the muons originating from the Water Module and Proton Module, events on the Water Module or Proton Module are required to have a track that penetrates at least two iron planes in one of the three horizontal INGRID modules near the beam center. This method for muon identification limits the phase space of the induced muon, because we reject the CC interactions with low-momentum muons, which do not penetrate the iron planes, and high-angle muons, which do not enter the three INGRID modules. The event selections applied to the three detectors are similar to that from a previous analysis [14], achieving a similar selection performance for the cross section measurements in the three targets. Figure 6 shows an event display of a typical signal event passing the event selection criteria for the Water Module.

### 5.1. Event selections for the Water Module

#### 5.1.1. Time clustering

Scintillator channels having charges larger than 2.5 p.e. are defined as a “hit”. Hits are clustered with the following criteria: if there are more than three hits within 100 ns in the Water Module, all the hits within 50 ns from the average time are grouped into a single cluster.

#### 5.1.2. 2D track reconstruction

The 2D tracks in the  $x$ – $z$  and  $y$ – $z$  views are reconstructed independently by using a cellular automaton algorithm [36] to cluster the hits. More details about the algorithm can be found in Ref. [36]. The hits in the neighbor scintillator planes are defined as a “cell”. Based on  $\chi^2$  values given by the linear fitting of the relevant hits, it is judged if the pair of two cells having a common hit are merged into

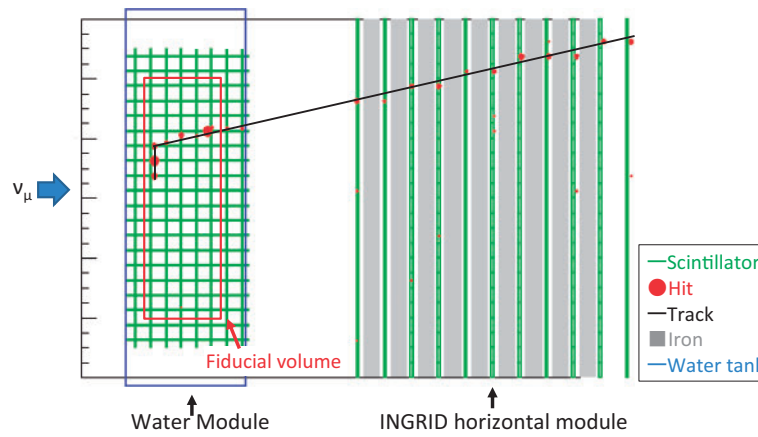

**Fig. 6.** An event display of a typical signal event passing the event selection criteria for the Water Module.

a new cell. This is repeated for all cells until no new cell is found and the long cells that have more than three hits are defined as tracks.

#### 5.1.3. 2D track matching with the horizontal INGRID modules

When 2D tracks are reconstructed in the same beam bunch for both the Water Module and the three horizontal INGRID modules near the beam center, an attempt is made to match one to the other. The tracks are matched if they meet the following requirements:

- The upstream edge of the reconstructed track in the three INGRID modules is in the most upstream two layers of the INGRID modules.
- The difference between the reconstructed angle of the three INGRID modules and the Water Module tracks with respect to the  $z$ -axis must be less than  $35^\circ$ .
- At the halfway point between the three INGRID modules and the Water Module, the distance between the three INGRID modules and the Water Module track is less than 150 mm.

#### 5.1.4. 3D track matching

3D tracks are formed among pairs of 2D INGRID-matched tracks in the  $x$ - $z$  plane and in the  $y$ - $z$  plane as long as the difference between the two measurements of the  $z$  coordinates of the most upstream hits is less than or equal to one plane of the parallel scintillators. If there are multiple candidates, we select a pair with the smallest difference in the most upstream hit point  $z$ . If there are still multiple candidates after the selection, we select a pair with the smallest difference in the most downstream hit point  $z$ .

Only events that have at least one INGRID-matched track are used for the analysis. Because the horizontal INGRID modules are located downstream of the Water Module, the angular acceptance is limited. In addition, the momentum acceptance is limited because the track is required to penetrate at least two iron planes of the INGRID modules for the matching.

#### 5.1.5. Vertexing

After the 3D track reconstruction, the most upstream  $z$  coordinate of each INGRID-matched 3D track is identified as a reconstructed vertex. If a pair of INGRID-matched 3D tracks meet the following conditions they are identified as tracks coming from a common vertex:

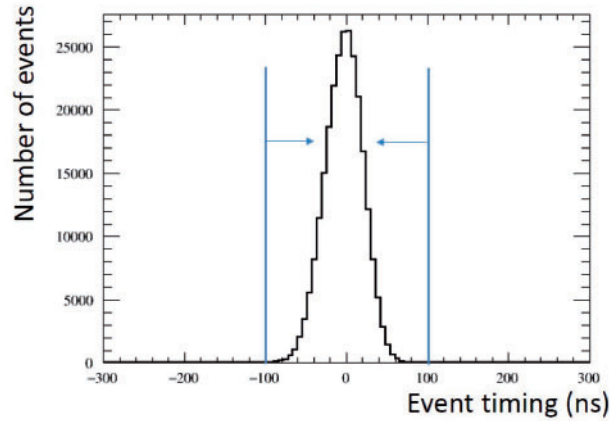

**Fig. 7.** Timing difference between the selected events and the expected beam bunch time, after the vertexing cut.

- The difference between the most upstream  $z$  coordinate of the two tracks in the  $x$ - $z$  view, added to the same difference in the  $y$ - $z$  view, has to be less than three planes of the parallel scintillators.
- The distance between the upstream  $z$  coordinate of the two tracks in the  $x$ - $y$  plane is less than 150 mm.

These cuts are applied to every vertex since each one is expected to correspond to a single neutrino interaction. The vertex position is redefined as that of the longest INGRID-matched track amongst those that belong to the common vertex. The longest INGRID-matched track is defined as a muon-like track.

#### 5.1.6. Beam timing cut

To reduce non-beam backgrounds, such as cosmic rays, only events within 100 ns of the expected beam bunch timing are selected, as shown in Fig. 7. The individual event timing is defined as the time recorded by the MPPC channel with the largest light yield.

#### 5.1.7. Upstream veto cut and fiducial cut

Two cuts are applied based on the position of the vertex to reduce beam-induced backgrounds from neutrino interactions outside the Water Module, mainly from the walls of the detector hall and the INGRID vertical modules. If the upstream point of a track is in the first or second plane of the parallel scintillators, then that event is rejected. The fiducial volume is defined as the central part of the Water Module with dimensions of 70 cm (in the  $x$  coordinate)  $\times$  70 cm (in the  $y$  coordinate)  $\times$  21 cm (in the  $z$  coordinate).

The vertex is required to be within the fiducial volume for the neutrino event to be selected. Figure 8 shows distributions of the vertex used for these two cuts.

#### 5.1.8. Reconstructed angle cut

The 3D angle of the longest reconstructed track from a vertex is required to be smaller than  $45^\circ$  to reduce large-angle muons since the detection efficiency for such kinds of events is less than 10%, as described in Sect. 5.5.

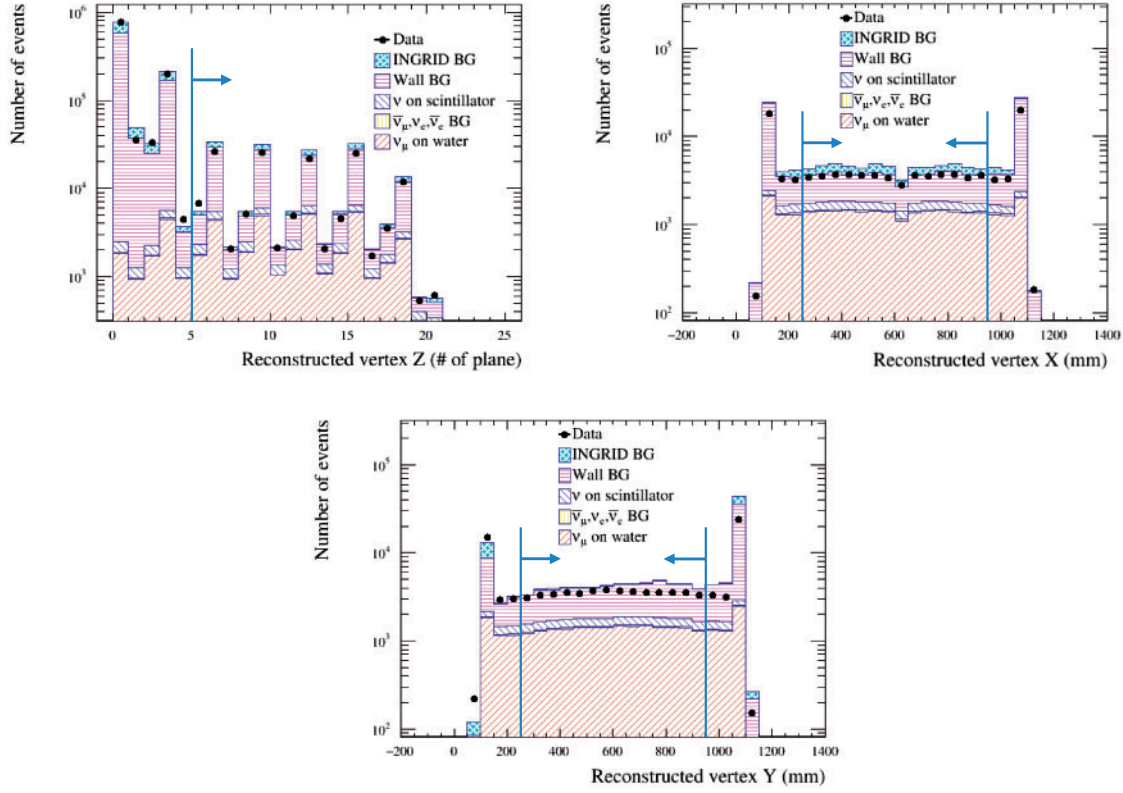

**Fig. 8.** Reconstructed vertex  $z$  distribution in the  $x$ - $z$  view before the front veto cut for the Water Module (upper left), reconstructed vertex  $x$  (upper right), and  $y$  (lower) distribution after the front veto cut for the Water Module. In the upper-left plot, the  $x$ -axis shows the number of the plane and the most upstream plane is set to 0. The spikes for the plane numbers that are multiples of 3 are due to the parallel scintillators. In the upper-right and lower plots, the center of the detector is set to 600 mm.

#### 5.1.9. Event selection summary

Table 4 shows a summary of the parameters used for the event selection. The numbers of selected events and the backgrounds in the Water Module at each selection step are summarized in Table 5. There are  $1.73 \times 10^4$  events expected in the MC after the event selection. The purity of the  $\nu_\mu$  CC interactions on  $\text{H}_2\text{O}$  is 69.0% and the main background is from neutrino interactions on the scintillators (19.8%). The remaining background sources are NC interactions (2.9%) due to misidentification of pions, neutrino interactions of  $\bar{\nu}_\mu$ ,  $\nu_e$ , and  $\bar{\nu}_e$  (2.0%), photons from  $\pi^0$  produced by neutrino interactions on the walls of the detector hall (2.4%), and backscattered production of neutrino interactions in the INGRID (3.1%). The muon-like tracks, identified as the longest INGRID-matched track, have 87% probability of being true muons. Figure 9 shows the neutrino energy, muon momentum, and angle distributions of the selected events predicted by MC. The main interaction modes are CCQE, CC1 $\pi$ , CC multi-pion, and DIS production. Figure 10 (upper left) shows the angle distribution of the reconstructed muon-like tracks for events that passed all event selections in the Water Module.

#### 5.2. Event selections for the Proton Module

The event selections for the Proton Module and INGRID module are very similar to those for the Water Module. However, due to the difference in the scintillator layout, a few



**Table 4.** Parameters used for the event selection criteria for the on-axis detectors.

|                            | Water Module                 | Proton Module       | INGRID module       |
|----------------------------|------------------------------|---------------------|---------------------|
| Time clustering            | $\pm 50$ ns                  | $\pm 50$ ns         | $\pm 50$ ns         |
| Track matching with INGRID | $\pm 35^\circ$               | $\pm 35^\circ$      | —                   |
|                            | $\pm 150$ mm                 | $\pm 150$ mm        | —                   |
| 3D track matching          | $\leq 1$ parallel plane      | $\leq 1$ plane      | $\leq 1$ plane      |
| Vertexing                  | $< 3$ planes                 | $< 2$ planes        | $< 2$ planes        |
|                            | $< 150$ mm                   | $< 150$ mm          | $< 150$ mm          |
| Beam timing                | $\pm 100$ ns                 | $\pm 100$ ns        | $\pm 100$ ns        |
| Upstream veto              | $\geq$ second parallel plane | $\geq$ second plane | $\geq$ first plane  |
| Fiducial                   | $700 \times 700$ mm          | $700 \times 700$ mm | $700 \times 700$ mm |
| Reconstructed angle        | $< 45^\circ$                 | $< 45^\circ$        | $< 45^\circ$        |

**Table 5.** Summary of the event selection for the Water Module. The purities of CC interactions are shown in parentheses.

| Selection       | Data     | MC                       |                    |                                     |                    |                    |                    |                    |
|-----------------|----------|--------------------------|--------------------|-------------------------------------|--------------------|--------------------|--------------------|--------------------|
|                 |          | CC                       | NC                 | $\bar{\nu}_\mu, \nu_e, \bar{\nu}_e$ | CH BG              | Wall BG            | INGRID BG          | All                |
| Vertexing cut   | 1175 980 | $4.39 \times 10^4$ (4%)  | $1.66 \times 10^2$ | $1.12 \times 10^3$                  | $1.08 \times 10^4$ | $9.10 \times 10^5$ | $2.77 \times 10^5$ | $1.24 \times 10^6$ |
| Front veto cut  | 100 790  | $2.77 \times 10^4$ (21%) | $1.04 \times 10^3$ | $9.38 \times 10^2$                  | $6.66 \times 10^3$ | $8.09 \times 10^4$ | $1.46 \times 10^4$ | $1.32 \times 10^5$ |
| Fiducial cut    | 17 992   | $1.25 \times 10^4$ (69%) | $4.68 \times 10^2$ | $4.42 \times 10^2$                  | $3.51 \times 10^3$ | $3.49 \times 10^2$ | $5.84 \times 10^2$ | $1.78 \times 10^4$ |
| Track angle cut | 17 528   | $1.20 \times 10^4$ (69%) | $4.53 \times 10^2$ | $4.39 \times 10^2$                  | $3.39 \times 10^3$ | $3.47 \times 10^2$ | $5.64 \times 10^2$ | $1.73 \times 10^4$ |

parameters for the cellular automaton algorithm and event selection have been optimized as listed in Table 4.

The numbers of selected events and the backgrounds in the Proton Module at each selection step are summarized in Table 6. After the event selection, a total of  $2.23 \times 10^4$  events are expected by MC. The purity of the CC interactions on CH is 85.4%. Background sources are NC interactions (4.2%), neutrino interactions of  $\bar{\nu}_\mu, \nu_e$ , and  $\bar{\nu}_e$  (2.4%), photons from  $\pi^0$  produced by neutrino interactions on the walls of the detector hall (2.1%), and backscattered events from neutrino interactions in the INGRID (5.2%). Figure 10 (upper right) shows the angle distribution of the reconstructed muon-like tracks for events that passed all event selections in the Proton Module.

### 5.3. Event selections for the INGRID module

The event selections are applied for the horizontal INGRID module located at the beam center with the parameters listed in Table 4. In addition, an “acceptance cut” is applied only for the INGRID module in order to achieve a similar angular acceptance with the Water Module and Proton Module. An imaginary module located directly behind the INGRID module is defined, as shown in Fig. 11. The distance between the INGRID module and the imaginary module is the same as that between the Water Module and the INGRID horizontal modules. The reconstructed tracks are then projected further downstream, even if the track has stopped in the INGRID module. If at least one reconstructed track from the vertex reaches the imaginary module, that event is selected.

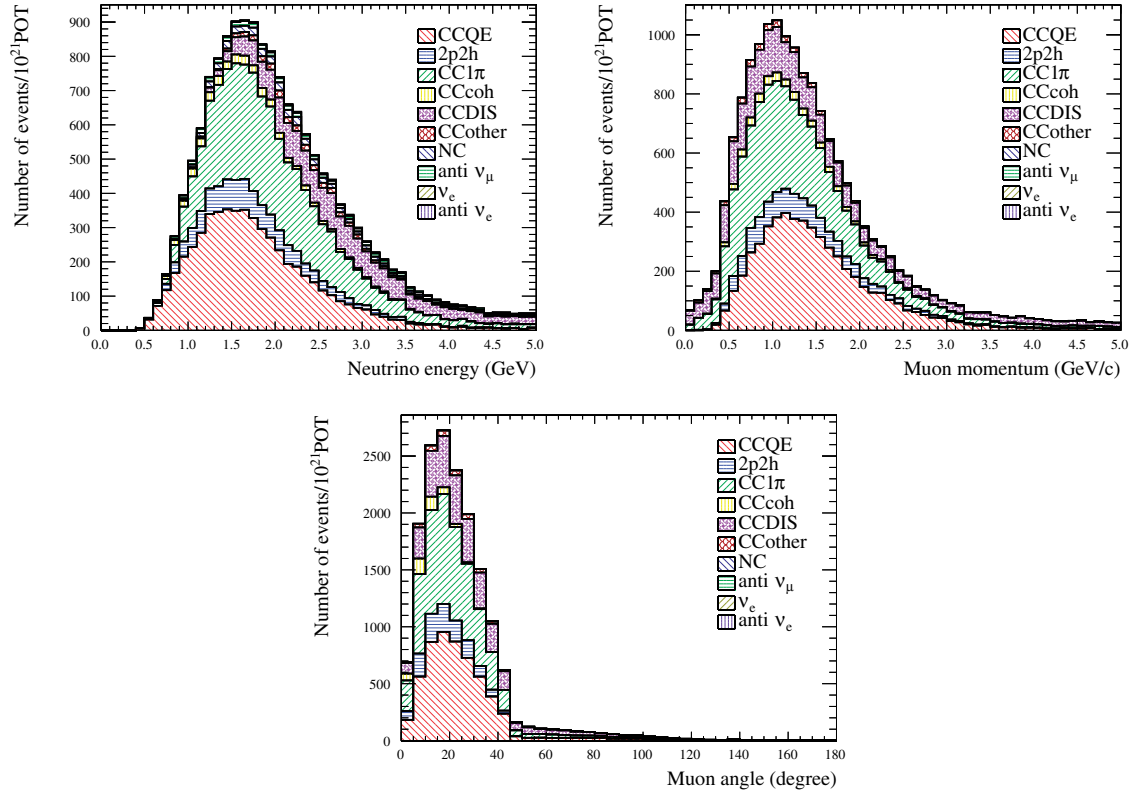

**Fig. 9.** MC prediction of the true neutrino energy (upper left), muon momentum (upper right), and muon scattering angle (lower) of the selected events for the Water Module.

The numbers of selected events and the backgrounds in the INGRID module at each selection step are summarized in Table 7. After the event selection, a total of  $3.12 \times 10^5$  events are expected by MC. The purity of the  $\nu_\mu$  CC interactions on Fe is 88.1%. Background sources are NC interactions (5.2%), neutrino interactions of  $\bar{\nu}_\mu$ ,  $\nu_e$ , and  $\bar{\nu}_e$  (2.9%), neutrino interactions on the scintillator (3.3%), photons from  $\pi^0$  produced by neutrino interactions on the walls of the detector hall (0.3%), and the other INGRID modules (0.2%). Figure 10 (lower) shows the angle distribution of the reconstructed muon-like tracks for events that passed all event selections in the INGRID module.

#### 5.4. Pileup correction for the INGRID module

If more than one neutrino event occurs in the detector at the same bunch timing, we sometimes fail to count them. Therefore, a correction must be applied to account for this event pileup effect. For the INGRID module, this effect is estimated in each bin of the reconstructed track angle by merging multiple bunches to enrich the pileup rate artificially. Table 8 shows the number of selected events before and after the pileup correction. For the Water Module and Proton Module, the effect of pileup is small due to the small target mass; therefore, no correction is applied.

#### 5.5. Selection efficiencies

Figure 12 shows the selection efficiency of CC interactions for the Water Module, Proton Module, and the INGRID module as a function of true muon scattering angle and momentum. Because the

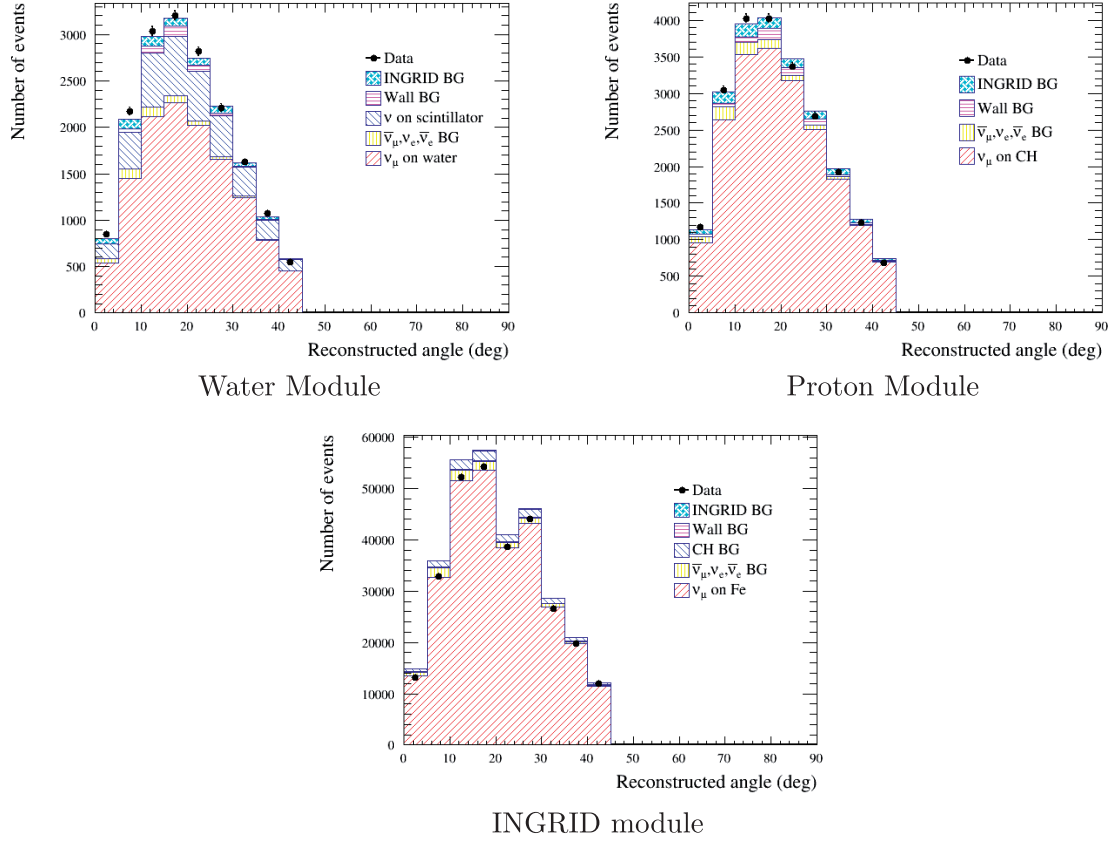

**Fig. 10.** Reconstructed angle of the longest track from a vertex after the event selection for the Water Module (upper left), Proton Module (upper right), and INGRID module (lower).

**Table 6.** Summary of the event selection for the Proton Module. The purities of CC interactions are shown in parentheses.

| Selection       | Data     | MC                       |                    |                                     |                    |                    |                    |
|-----------------|----------|--------------------------|--------------------|-------------------------------------|--------------------|--------------------|--------------------|
|                 |          | CC                       | NC                 | $\bar{\nu}_\mu, \nu_e, \bar{\nu}_e$ | Wall BG            | INGRID BG          | All                |
| Vertexing cut   | 1321 290 | $5.56 \times 10^4$ (4%)  | $2.66 \times 10^3$ | $2.00 \times 10^3$                  | $1.03 \times 10^6$ | $2.77 \times 10^5$ | $1.36 \times 10^6$ |
| Front veto cut  | 264 550  | $4.69 \times 10^4$ (15%) | $2.25 \times 10^3$ | $1.72 \times 10^3$                  | $2.17 \times 10^5$ | $3.63 \times 10^4$ | $3.04 \times 10^5$ |
| Fiducial cut    | 22 930   | $1.98 \times 10^4$ (85%) | $9.52 \times 10^2$ | $7.31 \times 10^2$                  | $5.54 \times 10^2$ | $9.97 \times 10^2$ | $2.32 \times 10^4$ |
| Track angle cut | 22 165   | $1.92 \times 10^4$ (85%) | $9.14 \times 10^2$ | $7.26 \times 10^2$                  | $5.51 \times 10^2$ | $9.50 \times 10^2$ | $2.23 \times 10^4$ |

selection efficiencies for the CC interactions with  $\theta_\mu > 45^\circ$  or  $p_\mu < 400$  MeV are less than 10%, these events are excluded from the signal sample defined in this analysis. Figure 13 shows the efficiency of the signal for the three detectors and their ratios as a function of the muon scattering angle. The signal efficiency is almost constant as a function of muon momentum, while it depends on the muon scattering angle. In this analysis, the cross section is calculated by a sum of the differential cross sections as a function of the muon scattering angle, as described in Sect. 6. In this method, the efficiency is calculated for each bin of the scattering angle and the dependence of the signal efficiency on the MC models used in this analysis is reduced.

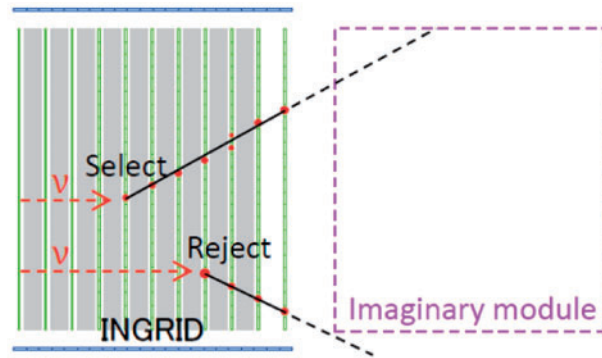

**Fig. 11.** An example of events selected and rejected by the “acceptance cut” for the INGRID module [37]. If at least one extended reconstructed track from the vertex reaches the imaginary module, the event is selected.

**Table 7.** Summary of the event selection for the INGRID module. The INGRID BG in the table represents backgrounds from the other INGRID modules. The purities of CC interactions are shown in parentheses.

| Selection       | Data     | MC                       |                    |                                     |                    |                    |                    |                    |
|-----------------|----------|--------------------------|--------------------|-------------------------------------|--------------------|--------------------|--------------------|--------------------|
|                 |          | CC                       | NC                 | $\bar{\nu}_\mu, \nu_e, \bar{\nu}_e$ | CH BG              | Wall BG            | INGRID BG          | All                |
| Vertexing cut   | 3019 430 | $1.11 \times 10^6$ (44%) | $6.98 \times 10^4$ | $3.20 \times 10^4$                  | $4.49 \times 10^4$ | $9.45 \times 10^5$ | $3.36 \times 10^5$ | $2.54 \times 10^6$ |
| Front veto cut  | 1468 490 | $1.07 \times 10^6$ (74%) | $6.74 \times 10^4$ | $3.07 \times 10^4$                  | $3.97 \times 10^4$ | $1.98 \times 10^5$ | $4.33 \times 10^4$ | $1.45 \times 10^6$ |
| Fiducial cut    | 431 211  | $4.10 \times 10^5$ (88%) | $2.58 \times 10^4$ | $1.14 \times 10^4$                  | $1.49 \times 10^4$ | $1.52 \times 10^3$ | $1.06 \times 10^2$ | $4.65 \times 10^5$ |
| Acceptance cut  | 308 971  | $2.88 \times 10^5$ (88%) | $1.81 \times 10^4$ | $9.56 \times 10^3$                  | $1.07 \times 10^4$ | $9.26 \times 10^2$ | $6.73 \times 10^2$ | $3.28 \times 10^5$ |
| Track angle cut | 293 418  | $2.74 \times 10^5$ (88%) | $1.72 \times 10^4$ | $9.31 \times 10^3$                  | $1.02 \times 10^4$ | $8.70 \times 10^2$ | $6.38 \times 10^2$ | $3.12 \times 10^5$ |

**Table 8.** The number of selected events for the INGRID module before and after the pileup correction.

| Reconstructed angle bin | $N_{\text{sel}}$ | $N_{\text{corr}}$ | $N_{\text{corr}}/N_{\text{sel}}$ |
|-------------------------|------------------|-------------------|----------------------------------|
| 0–5°                    | 13 106           | 13 582.0          | 1.036                            |
| 5–10°                   | 32 928           | 33 765.3          | 1.025                            |
| 10–15°                  | 52 272           | 53 671.3          | 1.027                            |
| 15–20°                  | 54 205           | 55 500.6          | 1.024                            |
| 20–25°                  | 38 540           | 39 119.4          | 1.015                            |
| 25–30°                  | 44 097           | 45 002.4          | 1.021                            |
| 30–35°                  | 26 615           | 26 984.1          | 1.014                            |
| 35–40°                  | 19 709           | 20 036.4          | 1.017                            |
| 40–45°                  | 11 946           | 12 094.0          | 1.012                            |
| Total                   | 293 418          | 299 755.5         | 1.022                            |

## 6. Cross section analysis

### 6.1. Analysis method

The flux-integrated  $\nu_\mu$  cross sections of CC interactions on water ( $\sigma_{\text{H}_2\text{O}}$ ), hydrocarbon ( $\sigma_{\text{CH}}$ ), and iron ( $\sigma_{\text{Fe}}$ ) defined in a restricted phase space of the induced muon,  $\theta_\mu < 45^\circ$  and  $p_\mu > 0.4 \text{ GeV}/c$ , are measured as a sum of the differential cross sections as a function of the muon scattering angle.

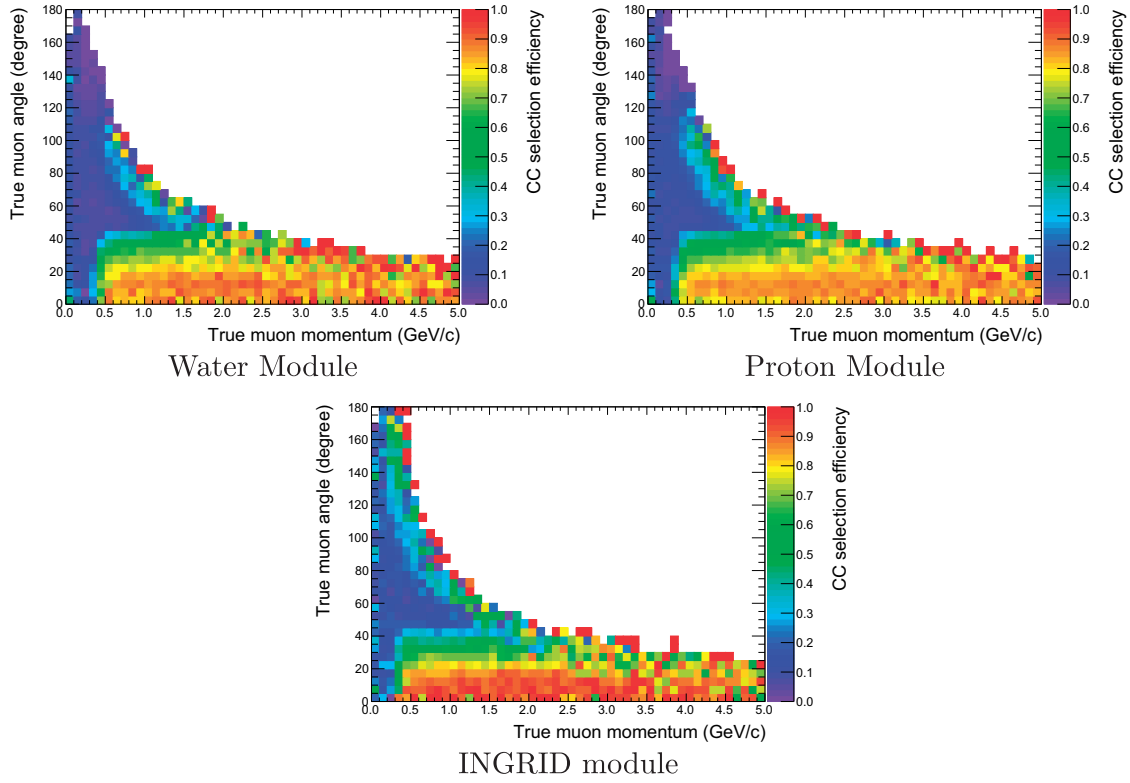

**Fig. 12.** Neutrino selection efficiency for CC interactions as a function of true muon scattering angle and momentum for the Water Module (upper left), Proton Module (upper right), and the INGRID module (lower).

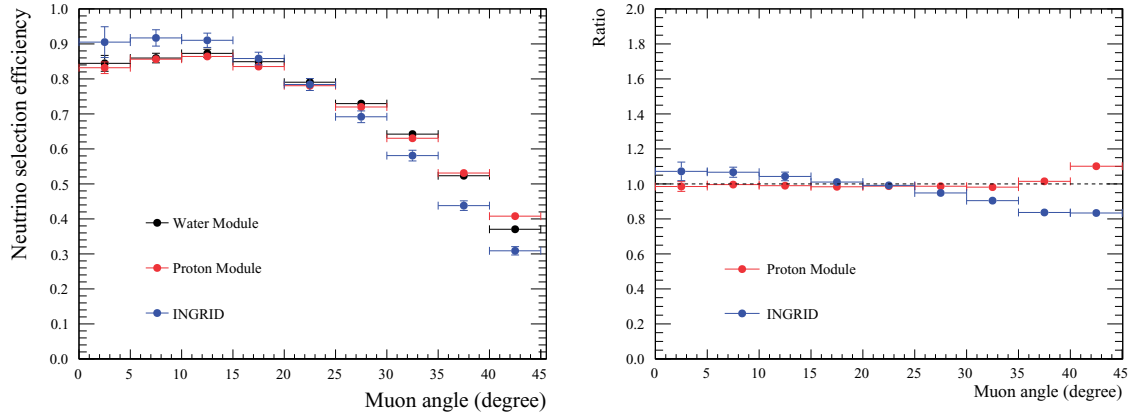

**Fig. 13.** Selection efficiency of the signal as a function of the muon scattering angle for the three detectors (left) and their ratio with respect to the Water Module (right).

They are calculated as follows:

$$\sigma_A = \sum_{ij} \frac{U_{ij} D(N_j^{\text{sel}} - N_j^{\text{BG}})}{\Phi_D^A T_D^A \epsilon_{iD}^A}, \quad (1)$$

where  $A$  represents the type of target material ( $\text{H}_2\text{O}$ ,  $\text{CH}$ , and  $\text{Fe}$ ) and  $D$  is the corresponding detector (Water Module, Proton Module, and INGRID).  $N^{\text{sel}}$  is the number of selected events,  $N^{\text{BG}}$  is the number of expected backgrounds,  $\Phi$  is the integrated  $\nu_\mu$  flux,  $T$  is the number of target nucleons,



and  $\varepsilon$  is the detection efficiency of the signal. Subscript  $i$  is a bin index of the true muon scattering angle and subscript  $j$  is a bin index of the reconstructed angle of the muon-like track. The true and reconstructed muon scattering angle bins are defined as 9 bins from  $0^\circ$  to  $45^\circ$  with a bin width of  $5^\circ$ , which are optimized based on the detector resolution.  $U_{ij}$  is a probability that events in the reconstructed angle bin  $j$  are in the true muon scattering angle bin  $i$ . The CC cross section ratios are estimated by taking the ratios of  $\sigma_{\text{H}_2\text{O}}$ ,  $\sigma_{\text{CH}}$ , and  $\sigma_{\text{Fe}}$ .

$N^{\text{sel}}$  is estimated based on data as shown in Fig. 10 for the Water Module and Proton Module, and Table 8 for the INGRID module with the pileup correction. Except for the  $\sigma_{\text{H}_2\text{O}}$  measurement with the Water Module, in which the backgrounds from CC interactions on plastic scintillator ( $N_{\text{WM}}^{\text{CH BG}}$ ) are estimated with data from the Proton Module, other backgrounds  $N^{\text{BG}}$  are estimated by MC simulation.  $N_{\text{WM}}^{\text{CH BG}}$  is estimated as follows:

$$\begin{aligned} N_{\text{WM}}^{\text{CH BG}} &= \sum_i \sigma_{i \text{ CH}} \Phi_{\text{WM}}^{\text{CH}} T_{\text{WM}}^{\text{CH}} \varepsilon_{i \text{ WM}}^{\text{CH}} \\ &= \sum_{ij} U_{ij \text{ PM}} (N_{j \text{ PM}}^{\text{sel}} - N_{j \text{ PM}}^{\text{BG}}) \frac{\Phi_{\text{WM}}^{\text{CH}} T_{\text{WM}}^{\text{CH}} \varepsilon_{i \text{ WM}}^{\text{CH}}}{\Phi_{\text{PM}}^{\text{CH}} T_{\text{PM}}^{\text{CH}} \varepsilon_{i \text{ PM}}^{\text{CH}}}, \end{aligned} \quad (2)$$

where  $\sigma_{i \text{ CH}}$  is the differential cross section on the CH target with the  $i$ th muon scattering angle bin. The other backgrounds are estimated by MC as summarized in Table 9 in detail. The integrated  $\nu_\mu$  fluxes  $\Phi$  are estimated to be  $\Phi_{\text{WM}}^{\text{H}_2\text{O}} = 3.72 \times 10^{13} / \text{cm}^2$  with  $7.25 \times 10^{21}$  POT,  $\Phi_{\text{PM}}^{\text{CH}} = 3.02 \times 10^{13} / \text{cm}^2$  with  $5.89 \times 10^{21}$  POT, and  $\Phi_{\text{INGRID}}^{\text{Fe}} = 2.99 \times 10^{13} / \text{cm}^2$  with  $5.89 \times 10^{21}$  POT by MC, as shown in Table 10. Although the data samples used for the Proton Module and the INGRID module are at the same delivered POT, the fact that the Proton Module is 1.2 m closer to the production target than the INGRID module leads to a small difference in the integrated flux between them. The number of target nucleons,  $T$ , is calculated based on measurements performed during the detector construction as shown in Table 11. The detection efficiency of the signal,  $\varepsilon$ , is estimated by MC as shown in Fig. 13 in each true muon scattering angle bin.

$U_{ij}$ , the probability that events in the reconstructed angle bin  $j$  are in the true muon scattering angle bin  $i$ , is calculated as follows based on Bayes's theorem:

$$\begin{aligned} U_{ij} &= P(\theta_i^{\text{true}} | \theta_j^{\text{recon}}) \\ &= P(\theta_j^{\text{recon}} | \theta_i^{\text{true}}) \times P(\theta_i^{\text{true}}) / P(\theta_j^{\text{recon}}) \\ &= P(\theta_j^{\text{recon}} | \theta_i^{\text{true}}) \times P(\theta_i^{\text{true}}) / \sum_k P(\theta_j^{\text{recon}} | \theta_k^{\text{true}}) P(\theta_k^{\text{true}}), \end{aligned} \quad (3)$$

where  $P(\theta_j^{\text{recon}} | \theta_i^{\text{true}})$  is calculated by MC as shown in Fig. 14.  $P(\theta_i^{\text{true}})$  is calculated by an iterative unfolding method [38], which is briefly described as follows:

- (1) set  $P(\theta_i^{\text{true}})$  to a flat prior,
- (2) calculate  $U_{ij}$ ,
- (3) set  $P(\theta_i^{\text{true}})$  to  $\sum_j U_{ij} (N_j^{\text{sel}} - N_j^{\text{BG}}) / \sum_{ij} U_{ij} (N_j^{\text{sel}} - N_j^{\text{BG}})$ ,
- (4) repeat (2)–(3).

The number of required iterations is set to 10 as described in Sect. 6.2.

**Table 9.** Summary of the fraction of backgrounds after event selection. Non-target element backgrounds are neutrino interactions on neither CH nor H<sub>2</sub>O for the Water Module, on O, N, and Ti for the Proton Module, and on scintillators for the INGRID module.

| Detector      | Angle bin | CC out of phase space | Non-target element | NC     | $\bar{\nu}_\mu, \nu_e, \bar{\nu}_e$ | Wall | INGRID | All BG |
|---------------|-----------|-----------------------|--------------------|--------|-------------------------------------|------|--------|--------|
| Water Module  | 0–5°      | 44.5                  | 26.1               | 28.6   | 43.5                                | 4.90 | 55.2   | 216    |
|               | 5–10°     | 98.2                  | 55.1               | 67.4   | 99.2                                | 36.7 | 96.6   | 477    |
|               | 10–15°    | 145                   | 72.0               | 83.7   | 103                                 | 73.8 | 10.3   | 615    |
|               | 15–20°    | 171                   | 76.3               | 86.4   | 75.6                                | 113  | 90.0   | 654    |
|               | 20–25°    | 165                   | 58.2               | 76.7   | 51.7                                | 58.9 | 77.2   | 527    |
|               | 25–30°    | 113                   | 43.6               | 54.8   | 30.9                                | 32.7 | 72.9   | 377    |
|               | 30–35°    | 84.4                  | 27.6               | 32.4   | 19.6                                | 13.2 | 33.4   | 229    |
|               | 35–40°    | 35.0                  | 15.6               | 16.3   | 10.9                                | 12.4 | 25.8   | 126    |
|               | 40–45°    | 40.2                  | 7.70               | 6.99   | 4.72                                | 1.24 | 9.74   | 82.4   |
|               | Total     | 896                   | 382                | 453    | 439                                 | 3.47 | 564    | 3300   |
| Proton Module | 0–5°      | 99.0                  | 12.9               | 60.3   | 79.7                                | 38.2 | 57.2   | 346    |
|               | 5–10°     | 255                   | 35.7               | 145    | 172                                 | 47.4 | 154    | 905    |
|               | 10–15°    | 338                   | 48.0               | 174    | 162                                 | 75.2 | 183    | 975    |
|               | 15–20°    | 352                   | 49.1               | 177    | 129                                 | 145  | 150    | 997    |
|               | 20–25°    | 313                   | 43.3               | 144    | 78.8                                | 104  | 124    | 803    |
|               | 25–30°    | 243                   | 34.5               | 101    | 50.6                                | 83.7 | 107    | 616    |
|               | 30–35°    | 148                   | 25.3               | 63.4   | 30.1                                | 23.9 | 90.4   | 379    |
|               | 35–40°    | 67.6                  | 16.6               | 32.4   | 15.2                                | 20.5 | 56.1   | 207    |
|               | 40–45°    | 83.5                  | 9.69               | 17.3   | 8.96                                | 12.4 | 28.3   | 159    |
|               | Total     | 1870                  | 275                | 914    | 726                                 | 551  | 950    | 5290   |
| INGRID module | 0–5°      | 1370                  | 507                | 769    | 766                                 | 95.7 | 7.96   | 3540   |
|               | 5–10°     | 2910                  | 1310               | 1690   | 1740                                | 145  | 101    | 7900   |
|               | 10–15°    | 4990                  | 1990               | 2680   | 2020                                | 147  | 122    | 11 900 |
|               | 15–20°    | 5630                  | 2020               | 3280   | 1720                                | 114  | 216    | 13 000 |
|               | 20–25°    | 3990                  | 1440               | 2100   | 1010                                | 109  | 49.0   | 8690   |
|               | 25–30°    | 5520                  | 1680               | 3070   | 993                                 | 126  | 88.8   | 11 500 |
|               | 30–35°    | 3320                  | 997                | 1660   | 588                                 | 58.0 | 19.7   | 6650   |
|               | 35–40°    | 3650                  | 702                | 1170   | 338                                 | 34.9 | 19.2   | 5920   |
|               | 40–45°    | 3080                  | 456                | 801    | 144                                 | 40.2 | 13.2   | 4530   |
|               | Total     | 34 500                | 11 100             | 17 200 | 9310                                | 870  | 638    | 73 600 |

**Table 10.** Integrated  $\nu_\mu$  flux in the fiducial volume of each detector.

|                                                                        | Water Module          | Proton Module         | INGRID module         |
|------------------------------------------------------------------------|-----------------------|-----------------------|-----------------------|
| Integrated $\nu_\mu$ flux per 10 <sup>21</sup> POT (/cm <sup>2</sup> ) | $5.13 \times 10^{13}$ | $5.13 \times 10^{13}$ | $5.08 \times 10^{13}$ |
| POT used in this analysis                                              | $7.25 \times 10^{20}$ | $5.89 \times 10^{20}$ | $5.89 \times 10^{20}$ |
| Integrated $\nu_\mu$ flux per used POT (/cm <sup>2</sup> )             | $3.72 \times 10^{13}$ | $3.02 \times 10^{13}$ | $2.99 \times 10^{13}$ |

**Table 11.** Summary of the number of target nucleons.

| Number of target nucleons            |                        |
|--------------------------------------|------------------------|
| $T_{\text{WM}}^{\text{H}_2\text{O}}$ | $4.939 \times 10^{28}$ |
| $T_{\text{WM}}^{\text{CH}}$          | $1.090 \times 10^{28}$ |
| $T_{\text{PM}}^{\text{CH}}$          | $9.230 \times 10^{28}$ |
| $T_{\text{ING}}^{\text{Fe}}$         | $1.206 \times 10^{30}$ |

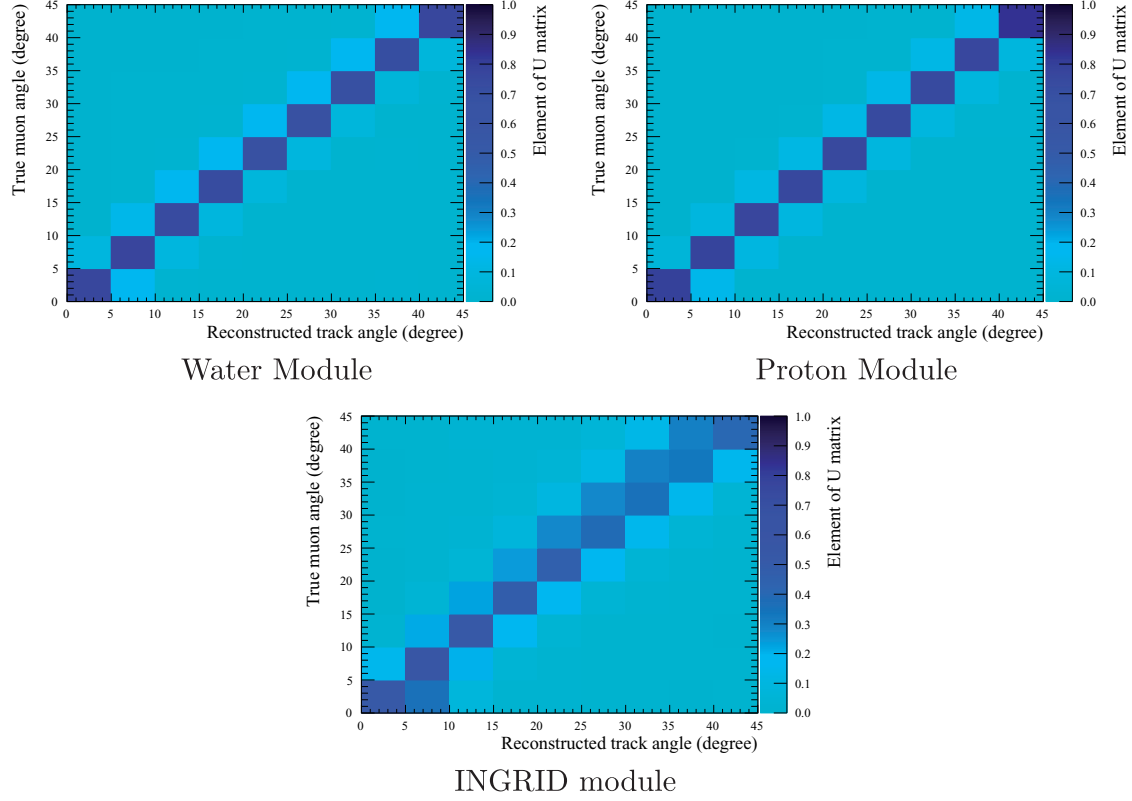

**Fig. 14.** Calculated reconstructed-to-true transfer matrix for the Water Module (upper left), Proton Module (upper right), and INGRID module (lower). The angle resolution for the INGRID module is worse than that for the Water Module and Proton Module due to differences in the scintillator width.

## 6.2. Consistency test

From the number of selected events and the quantities described earlier in this section, the flux-integrated CC cross sections on  $\text{H}_2\text{O}$ , CH, Fe and their ratios are calculated based on Eq. 1. In this section, a consistency test is performed by replacing the number of selected events of data with that of the MC expectation, in order to check the consistency between the calculated cross section and MC expectation. Figure 15 shows the relation between the number of iterations and deviations of the calculated cross sections from MC expectation and the number of iterations when it is set to 10. Table 12 shows the calculated cross sections and their consistency with the MC expectation. The consistency test is performed with not only the nominal cross section model but also a few alternative models.

## 7. Systematic uncertainties

There are three main sources of systematic uncertainties for the cross section measurements: neutrino flux, neutrino interaction models, and detector response. The uncertainty evaluation for each source is detailed in this section.

### 7.1. Systematic uncertainties from the neutrino flux

The T2K neutrino flux simulation, based on JNUBEAM as mentioned in Sect. 3, relies on several measurements as inputs, including the hadron production measurements and information from the J-PARC beam line monitors. The uncertainty on the flux prediction takes into account the uncertainties

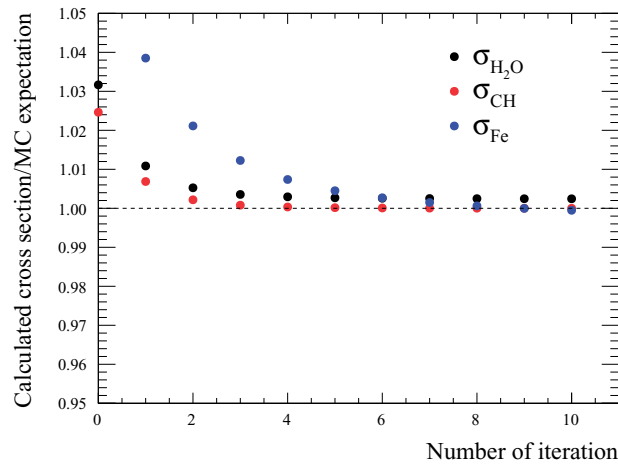

**Fig. 15.** Relation between the number of iterations and deviations of calculated cross sections from MC expectation.

**Table 12.** Calculated cross sections using numbers of events expected by MC and their true values with the nominal model.

| Target           | Calculated cross sections            | Expected cross sections              |
|------------------|--------------------------------------|--------------------------------------|
| H <sub>2</sub> O | $0.821 \times 10^{-38} \text{ cm}^2$ | $0.819 \times 10^{-38} \text{ cm}^2$ |
| CH               | $0.832 \times 10^{-38} \text{ cm}^2$ | $0.832 \times 10^{-38} \text{ cm}^2$ |
| Fe               | $0.904 \times 10^{-38} \text{ cm}^2$ | $0.904 \times 10^{-38} \text{ cm}^2$ |

in the measurements of the external hadron scattering experiments, mainly from NA61/SHINE [23, 24], hadronic interaction models, and uncertainties in the beam profile measurements with the beam line monitors. Details of the sources of the flux uncertainty can be found in Ref. [20]. Figure 16 shows the calculated total on-axis flux uncertainty as a function of neutrino energy. The dominant ones come from uncertainties of hadronic interactions.

The uncertainty of the neutrino flux is related to systematic uncertainties on the number of expected backgrounds ( $N^{\text{BG}}$ ), integrated flux ( $\Phi$ ), detection efficiency ( $\varepsilon$ ), and reconstructed-to-true transfer matrix ( $U$ ). To evaluate the systematic effects on the cross section measurement, the number of produced and selected neutrino events in each bin of the reconstructed track angle and true muon scattering angle is varied by using the calculated flux uncertainty, including correlations between the true neutrino energy bins. Therefore the variations of  $N^{\text{BG}}$ ,  $\Phi$ ,  $\varepsilon$ , and  $U$  are calculated and the variation of the cross section result is determined. This is repeated for many toy data sets and the 68% range of the distribution of the cross section variation around the central value is taken as the size of the flux-related systematic uncertainty. The first row in Table 13 shows the calculated flux uncertainties. They are approximately 10% for the absolute cross section measurement and 1–2% for the cross section ratios.

In addition, uncertainties due to the difference in position of the INGRID module compared with the Water Module and Proton Module and differences in the running periods of the Water Module, Proton Module, and INGRID module are estimated separately. The former is estimated to be 0.31% based on measurement of the detector location. The latter is estimated to be 1.03% based on the beam stability measurements of the INGRID module between the different running periods. Their quadratic sums are summarized in the second row of Table 13.

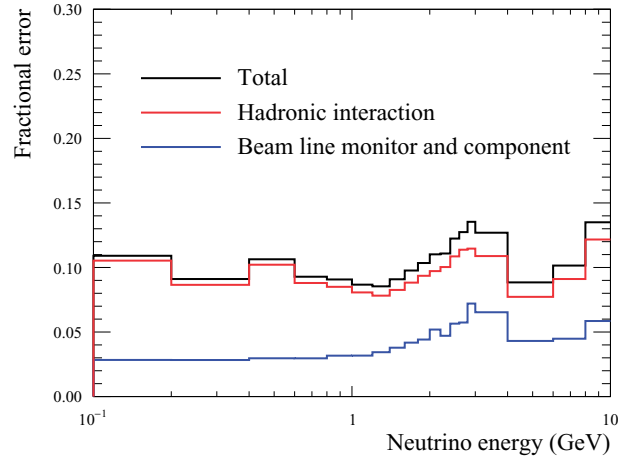

**Fig. 16.** Fractional uncertainty of the muon neutrino on-axis flux in each true neutrino energy bin.

**Table 13.** Summary of the systematic uncertainties for the cross section measurements (%).

| Systematic uncertainty                       | $\sigma_{\text{H}_2\text{O}}$ | $\sigma_{\text{CH}}$ | $\sigma_{\text{Fe}}$ | $\sigma_{\text{H}_2\text{O}}/\sigma_{\text{CH}}$ | $\sigma_{\text{Fe}}/\sigma_{\text{H}_2\text{O}}$ | $\sigma_{\text{Fe}}/\sigma_{\text{CH}}$ |
|----------------------------------------------|-------------------------------|----------------------|----------------------|--------------------------------------------------|--------------------------------------------------|-----------------------------------------|
| Flux-related                                 | +10.8                         | +11.5                | +13                  | +0.6                                             | +1.8                                             | +1.1                                    |
| (hadron production and beam line)            | −8.9                          | −9.6                 | −11                  | −0.6                                             | −1.8                                             | −1.2                                    |
| Flux-related                                 | +0.3                          | —                    | —                    | +1.3                                             | +1.1                                             | +0.3                                    |
| (difference of running periods and location) | −0.3                          | —                    | —                    | −1.3                                             | −1.1                                             | −0.3                                    |
| Interaction model-related                    | +2.6                          | +3.1                 | +5.2                 | +2.3                                             | +4.0                                             | +2.7                                    |
|                                              | −2.6                          | −3.1                 | −5.2                 | −2.3                                             | −4.0                                             | −2.7                                    |
| Detector response-related                    | +2.9                          | +2.5                 | +1.5                 | +4.5                                             | +3.4                                             | +2.8                                    |
|                                              | −2.9                          | −2.5                 | −1.5                 | −4.5                                             | −3.4                                             | −2.8                                    |
| Total                                        | +11.5                         | +13                  | +14                  | +5.2                                             | +5.7                                             | +4.1                                    |
|                                              | −9.7                          | −10                  | −12                  | −5.2                                             | −5.7                                             | −4.1                                    |

### 7.2. Systematic uncertainties from the neutrino interaction models

The NEUT neutrino interaction model has a number of uncertainties that can affect the detection efficiency ( $\varepsilon$ ), background contamination ( $N^{\text{BG}}$ ), and reconstructed-to-true transfer matrix ( $U$ ). To evaluate the model-related effect on the cross section measurement, for each  $\pm 1\sigma$  variation of a given interaction model parameter, a deviation of the cross section from the nominal value calculated based on the induced variation of  $\varepsilon$ ,  $N^{\text{BG}}$ , and  $U$  is set as a systematic uncertainty. Table 14 shows the nominal values and the uncertainties of the neutrino interaction parameters. More details about the simulation models used can be found in Ref. [29]. In addition, uncertainties from pion final state interactions inside nuclei are taken into account: for each type of interaction, the uncertainties are assigned as normalization, as shown in Table 14.

When the uncertainty is calculated, no correlation amongst the different target nuclei for the Fermi momentum ( $p_F$ ), binding energy ( $E_b$ ), 2p2h, and CC coherent normalizations is assumed. Full correlation amongst the different nuclei is assumed for the other parameters. Table 15 shows the calculated uncertainties and they are in a range between 2.6% and 5.2%. The dominant ones come from the uncertainties of the axial vector mass of the CCQE, CC1 $\pi$ , and the energy-dependent normalization of the CC multi-pion and DIS production. The uncertainty of the beam-induced backgrounds coming



**Table 14.** List of the interaction model parameters and uncertainties used in the analysis.

| Parameter                                                                              | Nominal value   | Uncertainties ( $1\sigma$ ) |
|----------------------------------------------------------------------------------------|-----------------|-----------------------------|
| CCQE-like                                                                              |                 |                             |
| $M_A^{\text{QE}}$                                                                      | 1.15 GeV/ $c^2$ | 0.18 GeV/ $c^2$             |
| $p_F^{12\text{C}}$                                                                     | 217 MeV/ $c$    | 31 MeV/ $c$                 |
| $p_F^{16\text{O}}$                                                                     | 225 MeV/ $c$    | 31 MeV/ $c$                 |
| $p_F^{56\text{Fe}}$                                                                    | 250 MeV/ $c$    | 35 MeV/ $c$                 |
| $E_b^{12\text{C}}$                                                                     | 25 MeV/ $c$     | 9 MeV/ $c$                  |
| $E_b^{16\text{O}}$                                                                     | 27 MeV/ $c$     | 9 MeV/ $c$                  |
| $E_b^{56\text{Fe}}$                                                                    | 33 MeV/ $c$     | 11 MeV/ $c$                 |
| 2p2h normalization $^{12\text{C}}$                                                     | 100%            | 100%                        |
| 2p2h normalization $^{16\text{O}}$                                                     | 100%            | 100%                        |
| 2p2h normalization $^{56\text{Fe}}$                                                    | 100%            | 100%                        |
| $1\pi$                                                                                 |                 |                             |
| $C_{A5}$                                                                               | 1.01            | 0.12                        |
| $M_A^{\text{Res}}$                                                                     | 0.95 GeV/ $c^2$ | 0.15 GeV/ $c^2$             |
| Isospin $\frac{1}{2}$ BG                                                               | 1.30            | 0.20                        |
| CC multi-pion and DIS production                                                       |                 |                             |
| Normalization uncertainty is applied depending on neutrino energy by $0.4/E_\nu$ (GeV) |                 |                             |
| CC coherent                                                                            |                 |                             |
| CC coherent normalization $^{12\text{C}}$                                              | 100%            | 30%                         |
| CC coherent normalization $^{16\text{O}}$                                              | 100%            | 30%                         |
| Normalization of NC interactions                                                       |                 |                             |
| NC coherent normalization                                                              | 100%            | 30%                         |
| NC multi-pion and DIS production normalization                                         | 100%            | 30%                         |
| Secondary interaction of pions                                                         |                 |                             |
| Pion absorption normalization                                                          | 100%            | 50%                         |
| Pion charge exchange normalization ( $p_\pi < 500$ MeV/ $c$ )                          | 100%            | 50%                         |
| Pion charge exchange normalization ( $p_\pi > 500$ MeV/ $c$ )                          | 100%            | 30%                         |
| Pion quasi-elastic normalization ( $p_\pi < 500$ MeV/ $c$ )                            | 100%            | 50%                         |
| Pion quasi-elastic normalization ( $p_\pi > 500$ MeV/ $c$ )                            | 100%            | 30%                         |
| Pion inelastic normalization                                                           | 100%            | 50%                         |

from outside of the detector is not included here, although it affects  $N^{\text{BG}}$ . It is calculated as one of the detector systematics, as described in Sect. 7.3.

In addition to the systematic effects estimated by NEUT, the uncertainties of backscattered protons and pions produced by neutrino interactions with nuclei, which mainly affect the position of the reconstructed vertex, are estimated independently. A fraction of the events generated inside the fiducial volume have reconstructed vertices outside the fiducial volume due to backscattered secondary protons or pions. The fraction of such events is 3.0% for the Water Module, 1.6% for the Proton Module, and 2.0% for the INGRID module with respect to the total number of selected events. The number and the uncertainty of such backscattered secondary particles may not be simulated well by NEUT, so a 50% conservative uncertainty is assumed, which leads to 1.5%, 0.8%, and 1.0% uncertainties for the Water Module, Proton Module, and INGRID module respectively in the total number of selected events. This is taken to be the  $1\sigma$  uncertainty for all reconstructed angle bins. In addition, no correlations between the target materials are assumed for this error.

**Table 15.** Summary of the neutrino interaction model-related uncertainties for each cross section measurement (%). Only the dominant systematic parameters are shown.

| Parameter                                                          | $\sigma_{\text{H}_2\text{O}}$ | $\sigma_{\text{CH}}$ | $\sigma_{\text{Fe}}$ | $\sigma_{\text{H}_2\text{O}}/\sigma_{\text{CH}}$ | $\sigma_{\text{Fe}}/\sigma_{\text{H}_2\text{O}}$ | $\sigma_{\text{Fe}}/\sigma_{\text{CH}}$ |
|--------------------------------------------------------------------|-------------------------------|----------------------|----------------------|--------------------------------------------------|--------------------------------------------------|-----------------------------------------|
| $M_{\text{A}}^{\text{QE}}$                                         | 1.1                           | 1.2                  | 1.6                  | 0.1                                              | 0.5                                              | 0.5                                     |
| $M_{\text{A}}^{\text{Res}}$                                        | 0.6                           | 1.2                  | 2.0                  | 0.5                                              | 1.5                                              | 1.0                                     |
| $C_{\text{A5}}$                                                    | 0.1                           | 0.3                  | 1.0                  | 0.3                                              | 1.0                                              | 0.7                                     |
| Isospin $\frac{1}{2}$ BG                                           | 0.1                           | 0.2                  | 0.6                  | 0.2                                              | 0.5                                              | 0.3                                     |
| CC multi-pion and DIS production                                   | 0.2                           | 0.7                  | 1.3                  | 0.5                                              | 1.1                                              | 0.6                                     |
| NC multi-pion and DIS production                                   | 0.8                           | 1.1                  | 1.7                  | 0.3                                              | 0.9                                              | 0.6                                     |
| 2p2h normalization $^{12}\text{C}$                                 | 0.1                           | 0.4                  | 0.3                  | 0.4                                              | 0.3                                              | 0.4                                     |
| 2p2h normalization $^{16}\text{O}$                                 | 0.2                           | 0                    | 0                    | 0.2                                              | 0.2                                              | 0                                       |
| 2p2h normalization $^{56}\text{Fe}$                                | 0                             | 0                    | 0.4                  | 0                                                | 0.4                                              | 0.4                                     |
| Pion absorption normalization                                      | 0.2                           | 0.1                  | 0.2                  | 0.2                                              | 0.4                                              | 0.2                                     |
| Pion quasi-elastic normalization ( $p_{\pi} < 500 \text{ MeV}/c$ ) | 0.2                           | 0.1                  | 0.1                  | 0.2                                              | 0.4                                              | 0.4                                     |
| Pion quasi-elastic normalization ( $p_{\pi} > 500 \text{ MeV}/c$ ) | 0.2                           | 0.1                  | 0.3                  | 0.1                                              | 0.1                                              | 0.1                                     |
| Pion inelastic normalization                                       | 0.2                           | 0.2                  | 0.3                  | 0.1                                              | 0.1                                              | 0.2                                     |
| Backscattered protons and pions                                    | 1.5                           | 0.8                  | 1.0                  | 1.8                                              | 1.8                                              | 1.3                                     |
| Total                                                              | 2.6                           | 3.1                  | 5.2                  | 2.3                                              | 4.0                                              | 2.7                                     |

### 7.3. Systematic uncertainties from the detector responses

Uncertainties of the detector response are estimated based on the difference between data and MC for the cosmic rays and beam-induced muons coming from outside of the detectors. We take into account the following errors: target mass, MPPC noise, scintillator crosstalk, hit efficiency of the scintillator, event pileup, beam-induced backgrounds from outside of the detector, 2D tracking efficiency, and 3D tracking efficiency. In addition, the uncertainties of the reconstructed variables used for the event selections are taken into account as follows: 2D track matching with the INGRID modules, 3D track matching, vertexing, beam timing cut, veto and fiducial volume cut, and reconstructed angle cut. The effect from non-beam-induced backgrounds is estimated to be less than 0.1% with beam-off data and is not included in the systematic uncertainties. The effect of the true and reconstructed muon angle binning is estimated to be less than 0.2% by changing the bin size and is not included in the systematic uncertainties.

In order to evaluate these uncertainties on the cross section measurement, MC simulations are produced by varying detector parameters independently within their uncertainties by  $1\sigma$ . The difference in the number of selected events in each bin of reconstructed track angle with respect to varying their uncertainty by  $1\sigma$  defines the  $1\sigma$  standard deviation systematic uncertainty in the number of events. Table 16 shows a summary of the uncertainties from the detector response for the absolute cross sections. For the measurements of the cross section ratios, no correlation is assumed between the three detectors except for the beam-induced backgrounds from outside the detector, which is treated as a common uncertainty. The fourth row in Table 13 shows the total uncertainty from the detector response. It is approximately 2% for the absolute cross section measurement and 4% for the cross section ratios because most of the systematics do not cancel between the detectors.

The total systematic uncertainties of the cross section measurements are estimated as a quadratic sum of the uncertainties of the neutrino flux, neutrino interaction, and detector response. Table 13 shows the total systematic uncertainties and they are between 10% and 14% for the absolute cross section measurements and approximately 5% for the cross section ratios.

**Table 16.** Summary of the detector systematic uncertainties for the absolute cross section measurements (%).

| Cross section               | $\sigma_{\text{H}_2\text{O}}$ |               | $\sigma_{\text{CH}}$ | $\sigma_{\text{Fe}}$ |
|-----------------------------|-------------------------------|---------------|----------------------|----------------------|
| Detector                    | Water Module                  | Proton Module | Proton Module        | INGRID               |
| Target mass                 | 0.68                          | 0.05          | 0.27                 | 0.14                 |
| MPPC noise                  | 0.01                          | 0.09          | 0.39                 | 0.09                 |
| Scintillator crosstalk      | 0.30                          | —             | —                    | —                    |
| Hit efficiency              | 0.27                          | 0.02          | 0.50                 | 0.94                 |
| Event pileup                | 0.72                          | 0.15          | 0.64                 | 0.09                 |
| Beam-related background     | 1.09                          | 0.31          | 1.31                 | 0.38                 |
| Non-beam-related background | 0.04                          | 0.02          | 0.02                 | 0.01                 |
| 2D track reconstruction     | 0.60                          | 0.28          | 1.18                 | 0.43                 |
| Track matching with INGRID  | 1.42                          | 0.20          | 0.84                 | —                    |
| 3D track matching           | 0.89                          | 0.13          | 0.56                 | 0.35                 |
| Vertexing                   | 0.44                          | 0.05          | 0.20                 | 0.28                 |
| Beam timing cut             | 0.06                          | 0.01          | 0.01                 | 0.01                 |
| VETO and FV cut             | 1.19                          | 0.18          | 0.72                 | 0.52                 |
| Acceptance cut              | —                             | —             | —                    | 0.61                 |
| Total                       | 2.88                          |               | 2.52                 | 1.54                 |

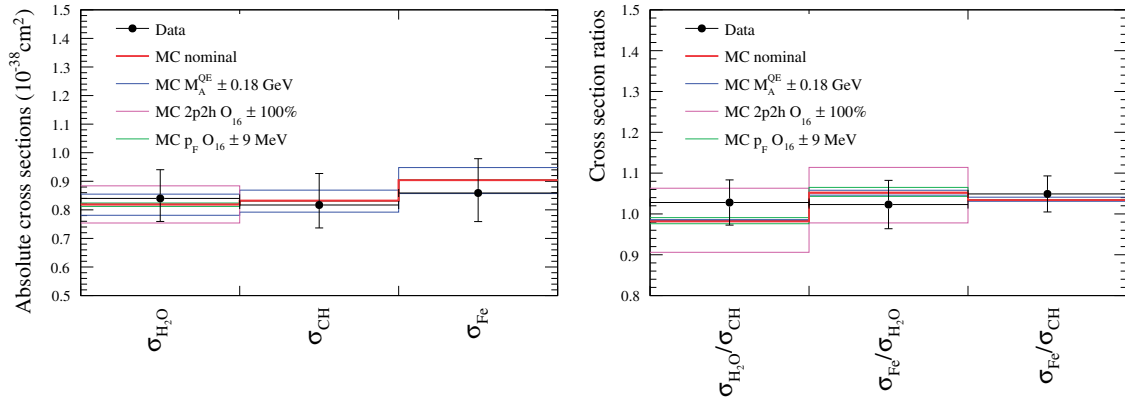**Fig. 17.** Results of the absolute cross section (left) and cross section ratio (right) measurements with total uncertainties and theoretical predictions by NEUT.

## 8. Results

The measured flux-integrated cross sections of  $\nu_\mu$  CC interactions per nucleon at a mean neutrino energy of 1.5 GeV, defined in a restricted phase space of induced muon,  $\theta_\mu < 45^\circ$  and  $p_\mu > 0.4$  GeV/c, on  $\text{H}_2\text{O}$ ,  $\text{CH}$ , and  $\text{Fe}$  are

$$\sigma_{\text{CC}}^{\text{H}_2\text{O}} = (0.840 \pm 0.010(\text{stat.})_{-0.08}^{+0.10}(\text{syst.})) \times 10^{-38} \text{ cm}^2/\text{nucleon}, \quad (4)$$

$$\sigma_{\text{CC}}^{\text{CH}} = (0.817 \pm 0.007(\text{stat.})_{-0.08}^{+0.11}(\text{syst.})) \times 10^{-38} \text{ cm}^2/\text{nucleon}, \quad (5)$$

$$\sigma_{\text{CC}}^{\text{Fe}} = (0.859 \pm 0.003(\text{stat.})_{-0.10}^{+0.12}(\text{syst.})) \times 10^{-38} \text{ cm}^2/\text{nucleon}. \quad (6)$$

The cross section ratios are

$$\frac{\sigma_{\text{CC}}^{\text{H}_2\text{O}}}{\sigma_{\text{CC}}^{\text{CH}}} = 1.028 \pm 0.016(\text{stat.}) \pm 0.053(\text{syst.}), \quad (7)$$

**Table 17.** Summary of the cross sections predicted by NEUT with the various parameter values listed in Table 14 ( $\times 10^{-38}$  cm<sup>2</sup>/nucleon for the absolute cross sections).

| Parameter                                                           | $\sigma_{\text{H}_2\text{O}}$ | $\sigma_{\text{CH}}$ | $\sigma_{\text{Fe}}$ | $\sigma_{\text{H}_2\text{O}}/\sigma_{\text{CH}}$ | $\sigma_{\text{Fe}}/\sigma_{\text{H}_2\text{O}}$ | $\sigma_{\text{Fe}}/\sigma_{\text{CH}}$ |
|---------------------------------------------------------------------|-------------------------------|----------------------|----------------------|--------------------------------------------------|--------------------------------------------------|-----------------------------------------|
| Nominal for H <sub>2</sub> O, CH, H <sub>2</sub> O/CH (RPA+RFG+MEC) | 0.819                         | 0.832                | —                    | 0.985                                            | —                                                | —                                       |
| Nominal for Fe, H <sub>2</sub> O/Fe, Fe/CH (RFG+MEC)                | 0.860                         | 0.875                | 0.904                | 0.982                                            | 1.052                                            | 1.034                                   |
| $M_{\text{A}}^{\text{QE}} - 1\sigma$                                | 0.781                         | 0.792                | 0.857                | 0.986                                            | 1.046                                            | 1.031                                   |
| $M_{\text{A}}^{\text{QE}} + 1\sigma$                                | 0.855                         | 0.869                | 0.948                | 0.984                                            | 1.058                                            | 1.041                                   |
| $M_{\text{A}}^{\text{Res}} - 1\sigma$                               | 0.779                         | 0.791                | 0.861                | 0.985                                            | 1.050                                            | 1.034                                   |
| $M_{\text{A}}^{\text{Res}} + 1\sigma$                               | 0.859                         | 0.873                | 0.948                | 0.984                                            | 1.054                                            | 1.037                                   |
| $C_{\text{A5}} - 1\sigma$                                           | 0.789                         | 0.800                | 0.871                | 0.986                                            | 1.061                                            | 1.046                                   |
| $C_{\text{A5}} + 1\sigma$                                           | 0.853                         | 0.866                | 0.941                | 0.984                                            | 1.054                                            | 1.037                                   |
| Isospin $\frac{1}{2}$ BG $-1\sigma$                                 | 0.806                         | 0.818                | 0.889                | 0.985                                            | 1.051                                            | 1.035                                   |
| Isospin $\frac{1}{2}$ BG $+1\sigma$                                 | 0.835                         | 0.848                | 0.923                | 0.985                                            | 1.053                                            | 1.037                                   |
| CC other shape $-1\sigma$                                           | 0.797                         | 0.809                | 0.880                | 0.985                                            | 1.052                                            | 1.036                                   |
| CC other shape $+1\sigma$                                           | 0.841                         | 0.854                | 0.928                | 0.985                                            | 1.053                                            | 1.037                                   |
| $p_{\text{F}}$ C $-1\sigma$                                         | 0.819                         | 0.835                | 0.904                | 0.981                                            | 1.052                                            | 1.028                                   |
| $p_{\text{F}}$ C $+1\sigma$                                         | 0.819                         | 0.825                | 0.904                | 0.993                                            | 1.052                                            | 1.045                                   |
| $p_{\text{F}}$ O $-1\sigma$                                         | 0.824                         | 0.832                | 0.904                | 0.991                                            | 1.043                                            | 1.034                                   |
| $p_{\text{F}}$ O $+1\sigma$                                         | 0.812                         | 0.832                | 0.904                | 0.976                                            | 1.065                                            | 1.034                                   |
| $E_{\text{b}}$ C $-1\sigma$                                         | 0.819                         | 0.831                | 0.904                | 0.986                                            | 1.052                                            | 1.035                                   |
| $E_{\text{b}}$ C $+1\sigma$                                         | 0.819                         | 0.833                | 0.904                | 0.984                                            | 1.052                                            | 1.032                                   |
| $E_{\text{b}}$ O $-1\sigma$                                         | 0.818                         | 0.832                | 0.904                | 0.984                                            | 1.054                                            | 1.034                                   |
| $E_{\text{b}}$ O $+1\sigma$                                         | 0.820                         | 0.832                | 0.904                | 0.986                                            | 1.051                                            | 1.034                                   |
| MEC norm C $-1\sigma$                                               | 0.819                         | 0.764                | 0.904                | 1.072                                            | 1.052                                            | 1.121                                   |
| MEC norm C $+1\sigma$                                               | 0.819                         | 0.900                | 0.904                | 0.910                                            | 1.052                                            | 0.959                                   |
| MEC norm O $-1\sigma$                                               | 0.754                         | 0.832                | 0.904                | 0.906                                            | 1.139                                            | 1.034                                   |
| MEC norm O $+1\sigma$                                               | 0.884                         | 0.832                | 0.904                | 1.063                                            | 0.978                                            | 1.034                                   |
| CCcoh norm C $-1\sigma$                                             | 0.819                         | 0.809                | 0.904                | 1.013                                            | 1.052                                            | 1.061                                   |
| CCcoh norm C $+1\sigma$                                             | 0.819                         | 0.855                | 0.904                | 0.958                                            | 1.052                                            | 1.007                                   |
| CCcoh norm O $-1\sigma$                                             | 0.800                         | 0.832                | 0.904                | 0.962                                            | 1.076                                            | 1.034                                   |
| CCcoh norm O $+1\sigma$                                             | 0.838                         | 0.832                | 0.904                | 1.007                                            | 1.030                                            | 1.034                                   |
| CCcoh norm Fe $-1\sigma$                                            | 0.819                         | 0.832                | 0.896                | 0.958                                            | 1.043                                            | 1.023                                   |
| CCcoh norm Fe $+1\sigma$                                            | 0.819                         | 0.832                | 0.913                | 0.958                                            | 1.062                                            | 1.044                                   |

$$\frac{\sigma_{\text{CC}}^{\text{Fe}}}{\sigma_{\text{CC}}^{\text{H}_2\text{O}}} = 1.023 \pm 0.012(\text{stat.}) \pm 0.058(\text{syst.}), \quad (8)$$

$$\frac{\sigma_{\text{CC}}^{\text{Fe}}}{\sigma_{\text{CC}}^{\text{CH}}} = 1.049 \pm 0.010(\text{stat.}) \pm 0.043(\text{syst.}). \quad (9)$$

The errors of both the measured absolute cross section and cross section ratios are dominated by the systematic uncertainties. This is the most precise measurement to date of neutrino cross sections on water in this energy region and the first measurement of neutrino cross section ratios of water to hydrocarbon and water to iron. Figure 17 shows the measured cross sections and their predictions by NEUT with nominal and varied parameters of the axial vector mass  $M_{\text{A}}^{\text{QE}}$ , normalization of 2p2h interaction, and Fermi momentum with  $1\sigma$ , which have a relatively large effect on the cross section ratios in the parameters listed in Table 14. This is due to the fact that the variations of 2p2h normalization and Fermi momentum are only applied for H<sub>2</sub>O but not CH and Fe as a conservative

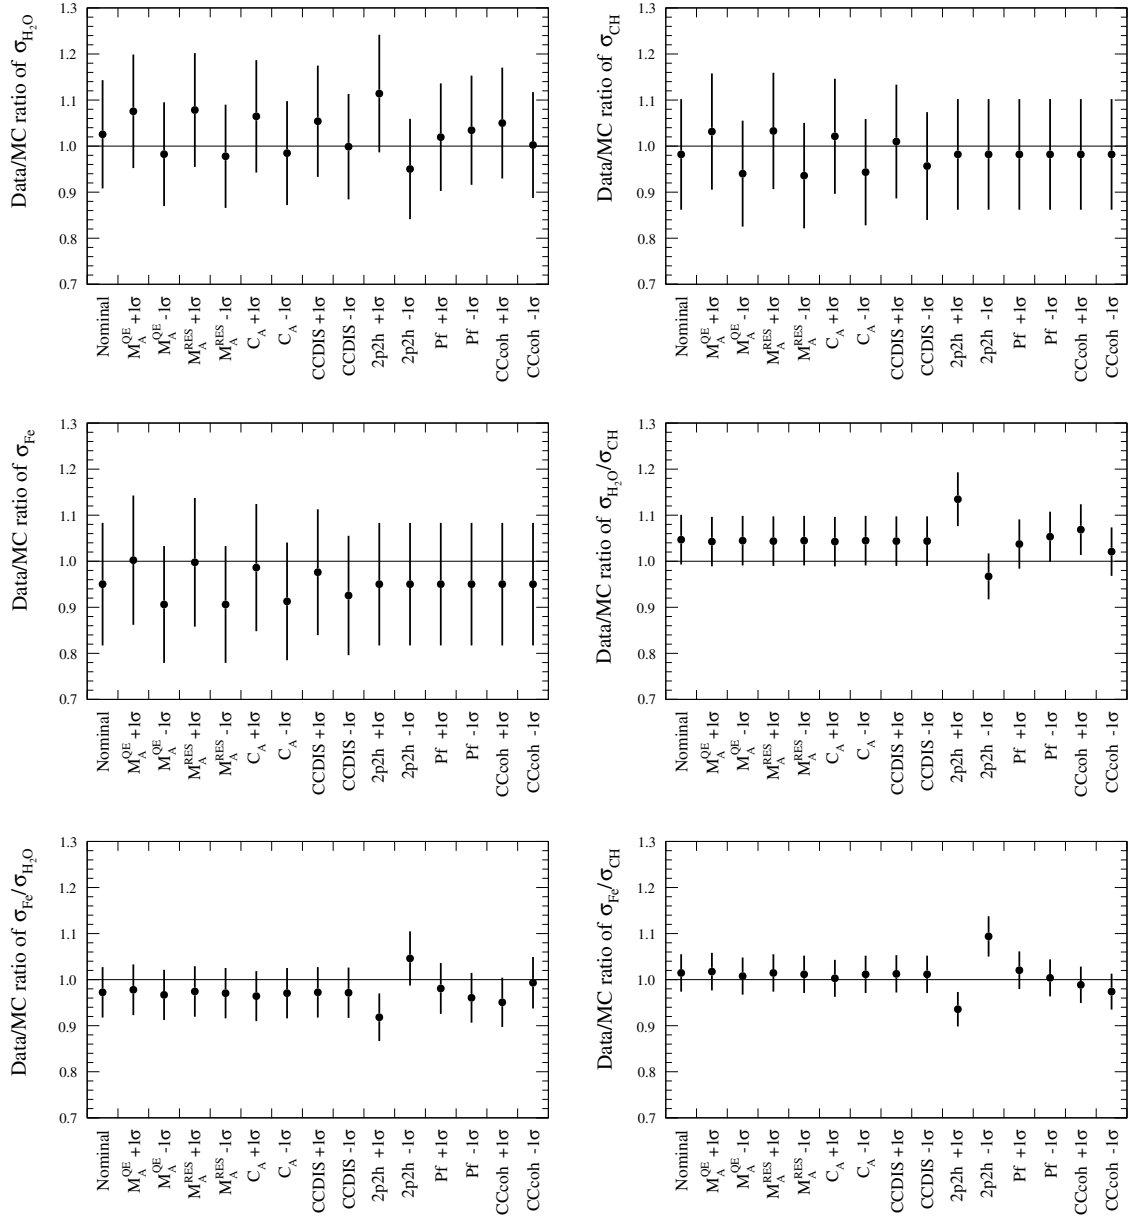

**Fig. 18.** Ratio of the cross sections between data and NEUT predictions with the various cross section parameters listed in Table 14. Error bars show the sum of the statistical and systematic uncertainties of the measurement.

way to deal with our poor understanding of the target dependence of the neutrino interaction. The predictions agree with the data within the uncertainties. This measurement validates the neutrino interaction models on the water target and the difference between water, plastic, and iron and confirms the reliability of the T2K oscillation analysis. Additional comparisons of data and predictions with other parameters of the neutrino interaction listed in Table 14 are summarized in Fig. 18 and Table 17. All of the predictions agree with the data within the estimated uncertainties. These results of the measurements and the neutrino flux at an on-axis location are provided in text and ROOT format on the website in Ref. [39].



## 9. Conclusion

For the precise measurement of neutrino oscillation parameters, understanding of neutrino interactions with nuclei is essential. We have reported measurements of the flux-integrated  $\nu_\mu$  charged-current cross sections on water, hydrocarbon, iron and their ratios in the T2K on-axis neutrino beam with a mean neutrino energy of 1.5 GeV in a restricted phase space for the kinematics of the induced muon with  $\theta_\mu < 45^\circ$  and  $p_\mu > 0.4$  GeV/c in the laboratory frame. This is the most precise measurement to date of neutrino cross sections on water in this energy region and the first measurement of neutrino cross section ratios of water to hydrocarbon and water to iron. The results agree with current neutrino interaction models used in the T2K oscillation analysis within their uncertainties.

## Funding

Open Access funding: SCOAP<sup>3</sup>.

## References

- [1] K. Abe et al. [T2K Collaboration], Nucl. Instrum. Meth. A **659**, 106 (2011).
- [2] K. Abe et al., Nucl. Instrum. Meth. A **694**, 211 (2012).
- [3] S. Assylbekov et al., Nucl. Instrum. Meth. A **686**, 48 (2012).
- [4] P.-A. Amaudruz et al. [T2K ND280 FGD Collaboration], Nucl. Instrum. Meth. A **696**, 1 (2012).
- [5] N. Abgrall et al. [T2K ND280 TPC Collaboration], Nucl. Instrum. Meth. A **637**, 25 (2011) [[arXiv:1012.0865](#) [physics.ins-det]] [[Search INSPIRE](#)].
- [6] D. Allan et al. [T2K UK Collaboration], J. Instrum. **8**, P10019 (2013).
- [7] S. Aoki et al., Nucl. Instrum. Meth. A **698**, 135 (2013).
- [8] S. Fukuda et al. [Super-Kamiokande Collaboration], Nucl. Instrum. Meth. A **501**, 418 (2003).
- [9] K. Abe et al. [T2K Collaboration], Phys. Rev. Lett. **121**, 171802 (2018) [[arXiv:1807.07891](#) [hep-ex]] [[Search INSPIRE](#)].
- [10] K. Abe et al. [T2K Collaboration], Phys. Rev. D **95**, 012010 (2017).
- [11] K. Abe et al. [T2K Collaboration], Phys. Rev. D **97**, 012001 (2018).
- [12] R. Gran et al. [K2K Collaboration], Phys. Rev. D **74**, 052002 (2006) [[arXiv:hep-ex/0603034](#)] [[Search INSPIRE](#)].
- [13] T. Koga et al., JPS Conf. Proc. **8**, 023003 (2015).
- [14] K. Abe et al. [T2K Collaboration], Phys. Rev. D **90**, 052010 (2014).
- [15] D. Beznosko, A. Bross, A. Dyshkant, A. Pla-Dalmau, and V. Rykalin, FERMILAB-PUB-05-344 (2005) (available at: <http://inspirehep.net/record/696273?ln=ja>).
- [16] Kuraray Co. Ltd. Scintillation Materials Catalogue (available at <http://kuraraypsf.jp/>).
- [17] Eljen Technology webpage (available at: <https://eljentechnology.com/products/accessories/ej-500>).
- [18] K.K. Hamamatsu Photonics (available at: <https://www.hamamatsu.com>).
- [19] A. Vacheret, S. Greenwood, M. Noy, M. Raymond, and A. Weber, IEEE Nuclear Science Symposium conference record (2007) (available at: <https://ieeexplore.ieee.org/document/4436543>).
- [20] K. Abe et al. [T2K Collaboration], Phys. Rev. D **87**, 012001 (2013); **87**, 019902 (2013) [addendum].
- [21] Y. Hayato, Acta Phys. Polon. B **40**, 2477 (2009).
- [22] GEANT–Detector Description and Simulation Tool, Application Software Group, Computing and Networks Division, CERN, Geneva, 1993 (available at: <http://inspirehep.net/record/863473?ln=ja>).
- [23] N. Abgrall et al. [NA61 Collaboration], J. Instrum. **9**, P06005 (2014) [[arXiv:1401.4699](#) [physics.ins-det]] [[Search INSPIRE](#)].
- [24] N. Abgrall et al. [NA61/SHINE Collaboration], Eur. Phys. J. C **76**, 84 (2016).
- [25] R. A. Smith and E. J. Moniz, Nucl. Phys. B **43**, 605 (1972); **101**, 547 (1975) [erratum].
- [26] J. Nieves, J. E. Amaro, and M. Valverde, Phys. Rev. C **70**, 055503 (2004); **72**, 019902 (2005) [erratum] [[arXiv:nucl-th/0408005](#)] [[Search INSPIRE](#)].
- [27] J. Nieves, I. Ruiz Simo, and M. J. Vicente Vacas, Phys. Rev. C **83**, 045501 (2011).
- [28] O. Benhar, A. Fabrocini, S. Fantoni, and I. Sick, Nucl. Phys. A **579**, 493 (1994).
- [29] K. Abe et al. [T2K Collaboration], Phys. Rev. D **96**, 092006 (2017); **98**, 019902 (2018) [erratum].
- [30] D. Rein and L. M. Sehgal, Ann. Phys. **133**, 79 (1981).
- [31] T. Sjöstrand, S. Mrenna, and P. Skands, Comput. Phys. Commun. **178**, 852 (2008).

- [32] M. Glück, E. Reya, and A. Vogt, Eur. Phys. J. C **5**, 461 (1998) [arXiv:hep-ph/9806404] [Search INSPIRE].
- [33] A. Bodek and U. K. Yang, AIP Conf. Proc. **670**, 110 (2003) [arXiv:hep-ex/0301036] [Search INSPIRE].
- [34] A. Bodek, I. Park, and U. K. Yang, Nucl. Phys. Proc. Suppl. **139**, 113 (2005) [arXiv:hep-ph/0411202] [Search INSPIRE].
- [35] Ch. Berger and L. M. Sehgal, Phys. Rev. D **79**, 053003 (2009) [arXiv:0812.2653 [hep-ph]] [Search INSPIRE].
- [36] H. Maesaka, *Doctoral Thesis*, Kyoto University (2005) (available at: [https://www-he.scphys.kyoto-u.ac.jp/theses/doctor/maesaka\\_dt.pdf](https://www-he.scphys.kyoto-u.ac.jp/theses/doctor/maesaka_dt.pdf)).
- [37] T. Kikawa, *Doctoral Thesis*, Measurement of Neutrino Interactions and Three Flavor Neutrino Oscillations in the T2K Experiment, Kyoto University (2013) (available at: [https://www-he.scphys.kyoto-u.ac.jp/theses/doctor/kikawa\\_dt.pdf](https://www-he.scphys.kyoto-u.ac.jp/theses/doctor/kikawa_dt.pdf)).
- [38] G. D'Agostini, Nucl. Instrum. Meth. A **362**, 487 (1995).
- [39] (available at: <http://t2k-experiment.org/results/ingriddata-numu-cc-inc-xs-on-h2o-2018>).
